1 **A sequence-based global map of regulatory activity for deciphering human genetics**

2

3 Kathleen M. Chen<sup>1,2</sup>, Aaron K. Wong<sup>2</sup>, Olga G. Troyanskaya<sup>1,2,3\*</sup>, Jian Zhou<sup>4,\*</sup>

4

5 <sup>1</sup>Department of Computer Science, Princeton University, Princeton, New Jersey, United States of  
6 America

7 <sup>2</sup>Flatiron Institute, Simons Foundation, New York, New York, United States of America

8 <sup>3</sup>Lewis-Sigler Institute for Integrative Genomics, Princeton University, Princeton, New Jersey,  
9 United States of America

10 <sup>4</sup>Lyda Hill Department of Bioinformatics, University of Texas Southwestern Medical Center,  
11 Dallas, Texas, United States of America

12

13 Correspondence to:

14 Olga G. Troyanskaya, email: [ogt@cs.princeton.edu](mailto:ogt@cs.princeton.edu)

15 Jian Zhou, email: [jian.zhou@utsouthwestern.edu](mailto:jian.zhou@utsouthwestern.edu)

16

17

18

19

20

21

22

23

24

25

26

27

28

29

30

31

32

33

34

35

36

37

38

39

40

## 41 **Abstract**

42 Sequence is at the basis of how the genome shapes chromatin organization, regulates gene  
43 expression, and impacts traits and diseases. Epigenomic profiling efforts have enabled large-  
44 scale identification of regulatory elements, yet we still lack a sequence-based map to  
45 systematically identify regulatory activities from any sequence, which is necessary for predicting  
46 the effects of any variant on these activities. We address this challenge with Sei, a new  
47 framework for integrating human genetics data with sequence information to discover the  
48 regulatory basis of traits and diseases. Our framework systematically learns a vocabulary for the  
49 regulatory activities of sequences, which we call sequence classes, using a new deep learning  
50 model that predicts a compendium of 21,907 chromatin profiles across >1,300 cell lines and  
51 tissues, the most comprehensive to-date. Sequence classes allow for a global view of sequence  
52 and variant effects by quantifying diverse regulatory activities, such as loss or gain of cell-type-  
53 specific enhancer function. We show that sequence class predictions are supported by  
54 experimental data, including tissue-specific gene expression, expression QTLs, and evolutionary  
55 constraints based on population allele frequencies. Finally, we applied our framework to human  
56 genetics data. Sequence classes uniquely provide a non-overlapping partitioning of GWAS  
57 heritability by tissue-specific regulatory activity categories, which we use to characterize the  
58 regulatory architecture of 47 traits and diseases from UK Biobank. Furthermore, the predicted  
59 loss or gain of sequence class activities suggest specific mechanistic hypotheses for individual  
60 regulatory pathogenic mutations. We provide this framework as a resource to further elucidate  
61 the sequence basis of human health and disease.

62

## 63 **Introduction**

64 Deciphering how regulatory functions are encoded in genomic sequences is a major challenge in  
65 understanding how genome variation links to phenotypic traits. Cell-type-specific regulatory  
66 activities encoded in elements such as promoters, enhancers, and chromatin insulators are critical  
67 to defining the complex expression programs essential for multicellular organisms, like those  
68 affecting cell lineage specificity and development. The majority of disease-associated variants  
69 from genome-wide association studies (GWAS) are located in noncoding regions<sup>1</sup> and may  
70 perturb regulatory elements, yet without knowing how changes in sequence affect regulatory  
71 activities we cannot predict the impact of these variants and uncover the regulatory mechanisms  
72 contributing to complex diseases and traits. Different variants in the same region can have  
73 distinct regulatory consequences and resulting phenotypic effects, as shown by mutations in  
74 enhancer regions of SHH<sup>2</sup>: for instance, a variant may turn off the expression of a gene critical  
75 for early development in specific tissue and location, while other variants in the same region may  
76 increase enhancer activity or have no effect at all.

77

78 Substantial progress has been made in the experimental profiling and integrative analysis of  
79 epigenomic marks, such as histone marks and DNA accessibility, across a wide range of tissues  
80 and cell types<sup>3-5</sup>. Histone marks are commonly used to identify regulatory elements; for

81 example, H3K4me3 can indicate active promoter regions and H3K27ac/H3K4me1 can indicate  
82 active enhancer regions. Moreover, histone marks and chromatin accessibility can be integrated  
83 with chromatin state models<sup>6–10</sup>. These works have been instrumental to annotating the genome  
84 with regulatory elements across many tissues.

85  
86 At the same time, deep learning sequence modeling techniques have been successfully applied to  
87 learn sequence features that are predictive of transcription factor binding and histone  
88 modifications<sup>11–17</sup>. These models are powerful tools for inferring the impact of sequence  
89 variation at the chromatin level. However, each chromatin-level prediction can only inform a  
90 very specific aspect of sequence--for example, whether a variant causes an increase or decrease  
91 of C/EBP- $\beta$  binding. We continue to lack a global, integrative view of sequence regulatory  
92 activities, including all major aspects of cis-regulatory functions, such as tissue-specific or broad  
93 enhancer and promoter activities. This limits our ability to interpret the integrated effects of all  
94 chromatin-level perturbations caused by genomic variants and determine their impact on human  
95 health and diseases.

96  
97 We address this challenge by creating a global map for sequence regulatory activity based on a  
98 new deep-learning-based framework called Sei. This framework introduces a new sequence  
99 model that predicts a comprehensive compendium of 21,907 publicly available chromatin  
100 profiles--the broadest set to-date--and uses the model to quantitatively characterize regulatory  
101 activities for any sequence with a novel vocabulary of sequence classes. Sequence classes cover  
102 diverse types of regulatory activities, such as promoter or cell-type-specific enhancer activity,  
103 across the whole genome by integrating sequence-based predictions from histone marks,  
104 transcription factors, and chromatin accessibility across a wide range of cell types. For example,  
105 ‘embryonic stem cell-specific enhancer’ sequence class activity may be estimated from the  
106 predicted binding of multiple transcription factors including Pou5F1, Sox2, and Nanog, as well  
107 as various histone marks, on a sequence. Importantly, sequence classes can be used to both  
108 classify and quantify the regulatory activities of any sequence based on predictions made by the  
109 deep learning sequence model. Therefore, sequence classes allow for the quantitative mapping of  
110 any mutation to its impact on cell-type-specific regulatory activities.

111  
112 The Sei framework thus provides an interpretable and systematic integration of sequence-based  
113 regulatory activity predictions (intrinsic information, based on sequence function) with human  
114 genetics data (extrinsic information, based on variant-phenotype association) for discovering the  
115 regulatory basis of human traits and disease. We applied our framework to characterize disease-  
116 and trait-associated regulatory disruptions by combining sequence class information and UK  
117 Biobank GWAS data. Sequence classes provide a non-overlapping partitioning of heritability in  
118 GWAS by regulatory activity, which we use to profile the regulatory architecture of 47 diseases  
119 and traits in UK Biobank GWAS<sup>18</sup>.

120

121 Moreover, variant effect prediction at the sequence-class-level newly enables the interpretation  
122 of regulatory mechanisms for individual disease mutations and can differentiate between gain-of-  
123 function and loss-of-function regulatory mutations. The regulatory and tissue-specific view  
124 provided by sequence classes suggests potential new mechanisms for individual disease-  
125 associated variants: for example, we used sequence classes to link mutations in blood-related  
126 diseases with previously unknown mechanisms to the malfunctioning of cell-type-specific  
127 enhancers.

128  
129 We provide the Sei framework as a resource for systematically classifying and scoring any  
130 sequence and variant with sequence classes, additionally providing the Sei model predictions for  
131 the 21,907 chromatin profiles underlying the sequence classes. The framework can be run using  
132 the code at <https://github.com/FunctionLab/sei-framework>, and a user-friendly web server is  
133 available at [hb.flatironinstitute.org/sei](http://hb.flatironinstitute.org/sei).

134

## 135 **Results**

136

### 137 **Developing a comprehensive sequence model for 21,907 chromatin profiles**

138 To capture the widest range of sequence features that are predictive of regulatory activities, we  
139 first developed a new deep learning sequence model, which we refer to as the Sei model, that  
140 enables the base-level interpretation of sequences by predicting 21,907 genome-wide cis-  
141 regulatory targets--including peak calls from 9,471 transcription factor profiles, 10,064 histone  
142 mark profiles and 2,372 chromatin accessibility profiles--with single nucleotide sensitivity. The  
143 majority of this data (19,905 profiles) is from the Cistrome Project<sup>5</sup>, a resource that uniformly  
144 processes and annotates public ChIP-, DNase-, and ATAC-seq datasets, and the remaining  
145 chromatin profiles were processed by the ENCODE<sup>3</sup> and Roadmap Epigenomics<sup>4</sup> projects. The  
146 Sei model encompasses an estimated ~1000 non-histone DNA-binding proteins (which we refer  
147 to as transcription factors), 77 histone marks, and chromatin accessibility across >1300 cell lines  
148 and tissues (Supplementary Files 1, 2).

149

150 To efficiently predict 21,907 chromatin profiles from sequence, we designed a novel model  
151 architecture (Supplementary Figure 1) and improved our training pipeline. The Sei model uses a  
152 new residual-block architecture with a dual linear and nonlinear path design: the linear path allows  
153 for fast and statistically efficient training, while the nonlinear path offers strong representation  
154 power and the capability to learn complex interactions. For scaling and performance, we  
155 introduced a layer of spatial basis functions, which integrates information across spatial locations  
156 with much higher memory efficiency than fully connected layers. The model takes as input a 4kb  
157 length sequence and predicts the probabilities of 21,907 targets at the center position. The model  
158 is trained on chromatin profile peak calls, which are binary (presence/absence), but the model  
159 output is continuous, representing probabilities of peaks. Our model training pipeline was updated



160 to improve training speed and performance by using on-the-fly sampling, which reduces  
161 overfitting by generating new training samples for every training step.

162

163 The model achieved an average area under the receiver-operating characteristic (AUROC) of 0.972  
164 and average area under the precision-recall curve (AUPRC) of 0.409 across all 21,907 chromatin  
165 profiles (Supplementary Figure 2). In addition to accurately predicting individual profiles, the  
166 predictions also recapitulated the correlation structure of these profiles, which indicates that the  
167 Sei model is able to capture the co-localization patterns of chromatin profiles (Supplementary  
168 Figure 3). Furthermore, the Sei model also improved over our best previously published model,  
169 DeepSEA “Beluga”<sup>13</sup>, on the 2002 chromatin profiles predicted by both models by 19% on average  
170 (as measured by AUROC/1-AUROC, Supplementary Figure 4).

171

172 Therefore, the Sei model is the most comprehensive chromatin-level sequence model to-date, and  
173 offers an expansive new resource for sequence and variant interpretation.

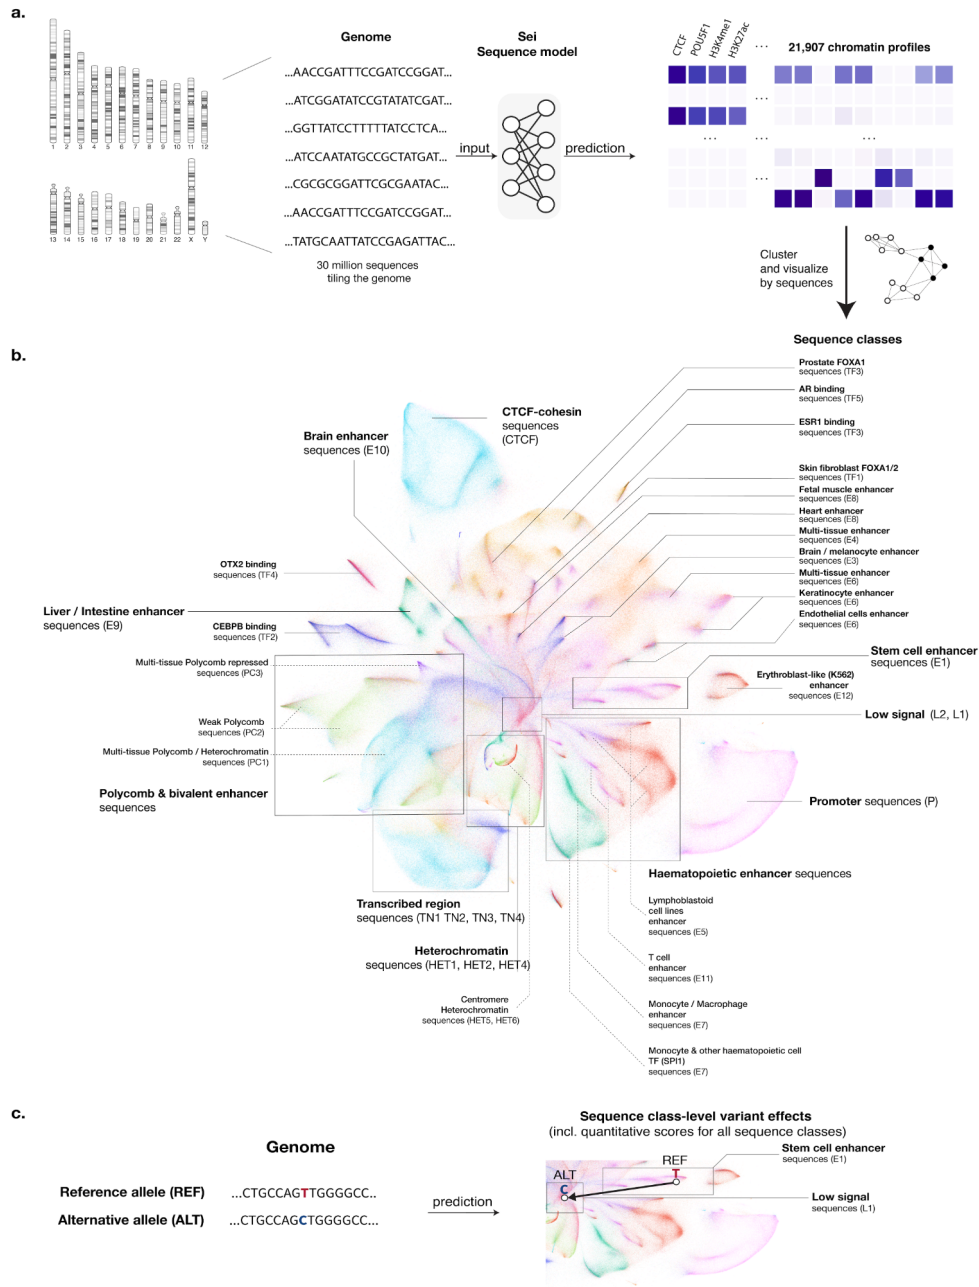

174

175 **Figure 1. Mapping the global regulatory landscape of genomic sequences.**

176 **a**, Overview of the Sei framework for systematic prediction of sequence regulatory activities. Sequence  
 177 classes are extracted from the predicted chromatin profiles of 30 million sequences evenly tiling the  
 178 genome. The predictions were made by Sei, a new deep convolutional network sequence model trained on  
 179 21,907 chromatin profiles. Specifically, classes are identified by applying Louvain community detection  
 180 to the nearest-neighbor graph of 180 principal components extracted from the predictions data. **b**,  
 181 Visualizing the global regulatory landscape of human genome sequences discovered by this approach  
 182 with UMAP. Major sequence classes include cell-type-specific enhancer classes, CTCF-cohesin,  
 183 promoter, TF-specific, and heterochromatin/centromere classes. **c**, This framework is further applied to  
 184 predict sequence-class-level genome variant effects, quantified by changes in sequence class scores.

185

186

### 187 **Defining sequence classes using a sequence model from whole genome sequences**

188 Next, we applied the Sei model to develop a global, quantitative map from genomic sequences to  
189 specific classes of regulatory activities, which we term sequence classes, by integrating the wide  
190 range of chromatin profiles predicted by Sei. Sequence classes are therefore mapped directly from  
191 sequence, and each sequence class represents a distinct program of regulatory activities across  
192 tissues and cell types as covered by the Sei model. Furthermore, sequence classes allow for the  
193 mapping of any sequence to quantitative scores that represent a broad spectrum of regulatory  
194 activities.

195

196 To cover the whole spectrum of sequence activities, we identified sequence classes from Sei  
197 predictions for 30 million sequences uniformly tiling the whole genome (4kb windows with 100bp  
198 step size). We visualized the global structure of sequence regulatory signals as represented by the  
199 model's chromatin profile predictions with nonlinear dimensionality reduction techniques<sup>19,20</sup>  
200 (Figure 1) and applied Louvain community clustering<sup>21</sup> to these predictions to categorize the 30  
201 million sequences into 40 sequence classes (Figure 1a).

202

203 This visualization of human genome sequences demonstrates the global organization of sequence  
204 regulatory activities (Figure 1b). The center of the visualization contains sequences with weak or  
205 no regulatory activity based on histone mark and TF enrichment, and sequences with specific  
206 regulatory activities radiate outwards, establishing a continuum from no activity to strong specific  
207 activity. Different branches of sequences are enriched in distinct chromatin modifications and  
208 transcription factors, and sequences with similar regulatory activities are grouped together. For  
209 example, tissue-specific enhancer sequences were predominantly grouped by tissue in the  
210 visualization (Figure 1b). In addition, sequences with repressive Polycomb marks were spatially  
211 adjacent to H3K9me3-marked heterochromatin sequences (Figure 1b), reflecting their extensive  
212 crosstalk in epigenetic silencing<sup>22-24</sup>. Notably, promoter-proximal and CTCF-cohesin binding  
213 sequences form two well-defined clusters that are separated from other sequences, which may  
214 reflect the distinct nature of these activities (Figure 1b).

215

216 The sequence classes identified from whole genome sequences recapitulate the sequence  
217 organization shown in the visualization and provide a basis for summarizing sequence activities  
218 globally and are robust to clustering parameter choices (Supplementary Figures 5, 6). To facilitate  
219 intuitive interpretation of sequence classes, we named them based on the corresponding  
220 enrichment of cis-regulatory profiles (Figure 2a, Supplementary Figures 7-12, Supplementary File  
221 3); specifically, we label each sequence class with a functional group acronym and index denoting  
222 the rank of the sequence class within the group (Supplementary Figure 13, e.g. E1 encompasses a  
223 larger proportion of the genome than E2). Because genomic sequences encode their regulatory  
224 activity programs across all cell types, sequence classes also show distinct activity patterns across

225 cell types and tissues. We label sequence classes primarily based on their active, cell-type-specific  
226 regulatory activities--in particular, promoter and enhancer activities. Therefore, sequence classes  
227 that are not labeled as enhancer ('E') or promoter ('P') generally lack enhancer or promoter activity  
228 in any cell type predicted by Sei.

229  
230 In summary, sequence classes contain 1 'P' promoter class, which is most strongly enriched in the  
231 active promoter histone mark H3K4me3 across all cell types (Figure 2a, Supplementary Figure 7);  
232 12 'E' enhancer classes, which are strongly enriched in enhancer histone marks, such as H3K4me1  
233 and H3K27ac, and transcription factors relevant to their activities in select cell types (e.g.  
234 PU.1/Spi1 in the E7 monocyte/macrophage enhancer class, HNF4- $\alpha$  in E9 liver/intestine, and  
235 Sox2/Nanog/Pou5f1 in E1 stem cell), and often display repressive H3K27me3 marks in inactive  
236 cell types (Figure 2a, Supplementary Figures 8-10, Supplementary File 3); 1 'CTCF' sequence  
237 class, which is strongly enriched in CTCF and cohesin (Figure 2a, Supplementary File 3); 5 'TF'  
238 sequence classes, which are enriched in a few specific transcription factors (e.g. CEBPB sequence  
239 class) but have weak or no enhancer mark enrichment (Figure 2a, Supplementary File 3); 4 'PC'  
240 Polycomb classes, which are enriched in the Polycomb-repressed region mark H3K27me3 and  
241 generally not enriched in active promoter or enhancer marks (Figure 2a, Supplementary Figure  
242 10); 6 'HET' heterochromatin classes, which are enriched in the heterochromatin mark H3K9me3  
243 (Figure 2a, Supplementary Figure 11); 4 'TN' sequence classes, which are enriched in transcription  
244 elongation marks H3K36me3 or H3K79me2 (Figure 2a, Supplementary Figure 12); and finally, 7  
245 'L' (low signal) sequence classes, which are not strongly enriched in any of the above marks  
246 (Figure 2a). As a whole, the 40 sequence classes cover >97.4% of the genome (Supplementary  
247 Figure 13).

248  
249 Beyond classifying genomic sequences to sequence classes, we define sequence class scores to  
250 provide a global and quantitative representation of sequence regulatory activities. This for the  
251 first time allows us to (1) predict the regulatory activity for any sequence and (2) quantify the  
252 changes in regulatory activity caused by any sequence variant. Sequence class scores summarize  
253 predictions for all 21,907 chromatin profiles based on weights specific to each sequence class,  
254 which are computed by projecting Sei predictions onto unit-length vectors that point to the center  
255 of each sequence class. Sequences that score highly for a particular sequence class have high  
256 predictions for the chromatin profiles associated with that class. Sequence class scores thus allow  
257 for the quantification of the regulatory activity of any sequence, where the impact of a variant is  
258 represented by the difference between the sequence class scores for the reference and alternative  
259 alleles. Importantly, this capability is only allowed by modeling the sequence dependencies of  
260 sequence class activities and cannot be directly obtained from chromatin profiling data alone.

261

262 **Enhancer sequence classes predict tissue-specific gene expression**

263 The group of sequences that are likely most impactful to tissue-specific gene expression  
264 regulation are the enhancer ('E') sequence classes, thus here we assessed the association of  
265 enhancer sequence class scores with tissue-specific gene expression.  
266

267 In the visualization of sequence regulatory activities, sequence classes with different cell type-  
268 and tissue-specific enhancer activities are localized to distinct subregions (Figure 1b). 'E'  
269 sequence classes capture both specific and broad enhancer activities. Based on enhancer mark  
270 enrichment (Supplementary Figures 8, 9), E7 is specific for monocyte/macrophage, E11 is  
271 specific for T-cell, E5 is specific for lymphoblastoid/B-cell-like cell lines, E9 is specific for liver  
272 and intestine, E1 is specific for embryonic stem cells & induced pluripotent stem cells, and E10  
273 and E3 are specific for brain (Figure 1, 2; all enrichments stated are significant with  $p < 2.2e-16$ ,  
274 Fisher's exact test, two-sided). In contrast, broad enhancer sequence classes can either  
275 encompass enhancer activity in similar cell types across different tissues, such as fibroblast (E2)  
276 and epithelial (E6) cell types (Supplementary Figures 8, 9), or encompass enhancer activity in  
277 many different cell types; for example, E4 is enriched in fibroblast, muscle, astrocytes,  
278 osteoblast, epithelial, and other cell types. Sequence class enhancer activities are also supported  
279 by the enrichment of relevant chromatin states<sup>3</sup> and DNase I hypersensitive sites<sup>25</sup> across tissues  
280 and cell types (Supplementary Figures 14, 15). Consistent with their predicted enhancer  
281 activities, the coverage of 'E' sequence class annotations within a 10kb window to transcription  
282 start sites (TSS) are correlated with the differential expression patterns of these genes in the  
283 corresponding cell types over the tissue-average (Figure 2b).  
284

285 Since sequence class scores allow us to systematically predict the effects of variants on higher-  
286 level regulatory functions, we can estimate whether a given variant diminishes, maintains, or  
287 increases the enhancer activity of a sequence based on the difference between the sequence class  
288 scores for the reference and alternative alleles. Evaluated on GTEx eQTL data<sup>26</sup>, we found that  
289 variants predicted to increase 'E' sequence class activity were significantly positively correlated  
290 with higher gene expression, whereas those predicted to increase 'PC' sequence class activity were  
291 significantly negatively correlated with gene expression--consistent with the expected repressive  
292 role of 'PC' sequence class activities (Figure 2c). Moreover, when only analyzing fine-mapped  
293 eQTLs<sup>27</sup> with high posterior inclusion probability ( $>0.95$ ), we observed higher correlations with  
294 overall comparable levels of significance (Supplementary Figure 16). Therefore, sequence classes  
295 can distinguish the effects of variants on gene expression based on their consequences in regulatory  
296 activities.

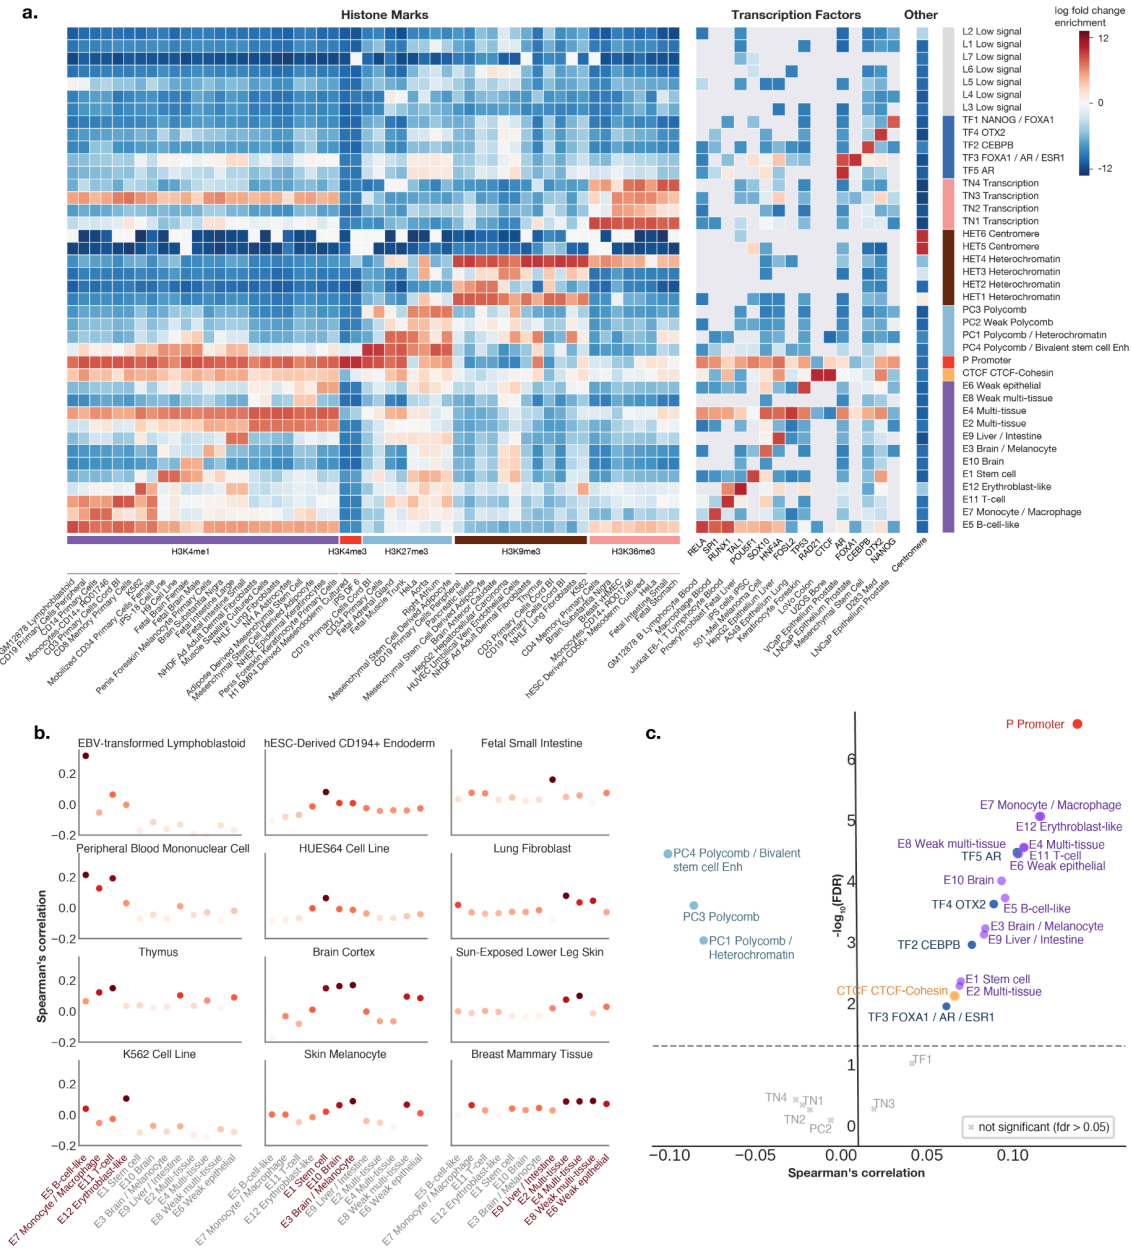

297  
 298 **Figure 2. Sequence classes predict cell-type-specific regulatory activities and directional,**  
 299 **expression-altering variant effects.** **a**, Sequence-class-specific enrichment of histone marks,  
 300 transcription factors, and repeat annotations. Log fold change enrichment over genome-average  
 301 background is shown in the heatmap. No overlap is indicated by the gray color in the heatmap. Top 1-2  
 302 histone mark and TF annotation enrichments were selected for each sequence class. **b**, Enhancer sequence  
 303 classes near transcription start sites are correlated with cell-type-specific gene expression in the applicable  
 304 tissue or cell types (see Methods). The y-axis shows the Spearman correlation between the proportion of  
 305 each sequence class annotation within 10kb of TSS and the tissue-specific differential gene expression  
 306 (fold over tissue-average). **c**, Regulatory sequence-class-level variant effects are predictive of directional  
 307 GTEx variant gene expression effects. The x-axis shows Spearman correlations between the predicted  
 308 sequence-class-level variant effects and the signed GTEx variant effect sizes (slopes) for variants with



309 strong predicted effects near transcription start sites (Methods) and the y-axis shows the corresponding  
310 log<sub>10</sub> p-values. All colored dots are above the Benjamini-Hochberg FDR < 0.05 threshold.

311

312

### 313 **Regulatory sequence classes are under evolutionary constraints**

314 Variants that alter regulatory activities of sequences often disrupt gene regulation and are  
315 therefore expected to impact human health and disease. We tested this expectation by comparing  
316 human population genome variant allele frequencies<sup>28</sup> based on the sequence class in which each  
317 variant is located and the predicted variant effect on that sequence class. Indeed, we found that  
318 variants localized in regulatory sequence classes (E-, P-, and CTCF- ) have lower common  
319 variant frequency than variants in other sequence classes, and therefore showed higher overall  
320 negative selection constraint (Figure 3a, x-axis). More importantly, variants predicted to strongly  
321 perturb regulatory sequence classes had significantly lower common variant frequencies than  
322 variants that weakly perturb these classes (measured by bidirectional variant effect constraint,  
323 Figure 3a y-axis, see also Figure 3b, Methods). This is therefore consistent with the hypothesis  
324 that disruption of regulatory sequence class activities has a major negative impact on fitness,  
325 which we refer to as a negative selection signature.

326

327 Specifically, we observed strong negative selection signatures for variants assigned to all E,  
328 CTCF and P sequence classes (Figure 3). Multi-tissue enhancer sequence classes E4 and E2 and  
329 the brain enhancer sequence class E10 show the strongest association of predicted sequence-  
330 class-level variant effects and common variant frequencies. Notably, for the CTCF sequence  
331 class, only negative variant effects--decreasing sequence class activity--appear to be under very  
332 strong constraints, suggesting that CTCF sites are generally tolerant to positive effect mutations  
333 that further increase CTCF binding. This is in contrast to the generally deleterious impact of both  
334 increase and decrease of enhancer and promoter activities. As expected, TN sequence classes,  
335 which overlap with protein-coding regions, are among the sequence classes with the lowest allele  
336 frequency (Supplementary Figure 17).

337

338 In contrast, those assigned to HET, PC, TF, and L sequence classes generally did not show  
339 strong negative selection signatures and had higher overall common variant frequencies  
340 (Supplementary Figure 17). Importantly, this does not suggest that Polycomb or transcription  
341 factors are inessential: the HET, PC, TF, and L classes generally do not show strong enhancer or  
342 promoter histone mark enrichment in any cell type (with the exception of bivalent marks in stem  
343 cells observed in PC4), and thus they are expected to play less major roles in gene expression  
344 regulation. However, Polycomb-related regulation is likely critical for 'E' and 'P' sequence  
345 classes, which are often Polycomb-repressed in some cell types but enhancers or promoters in  
346 other cell types (Supplementary Figures 7-10). Similarly, we expect that TF binding plays a  
347 central role in 'E' classes that are highly enriched in relevant TFs (Figure 2a, Supplementary File  
348 3).

349

350 Therefore, sequence classes show distinct evolutionary constraints, and ‘E’ enhancer sequence  
351 classes show the strongest bidirectional constraints. This suggests that both increases and  
352 decreases of enhancer activity are expected to lead to deleterious effects on fitness, highlighting  
353 the importance of precisely controlling gene expression.

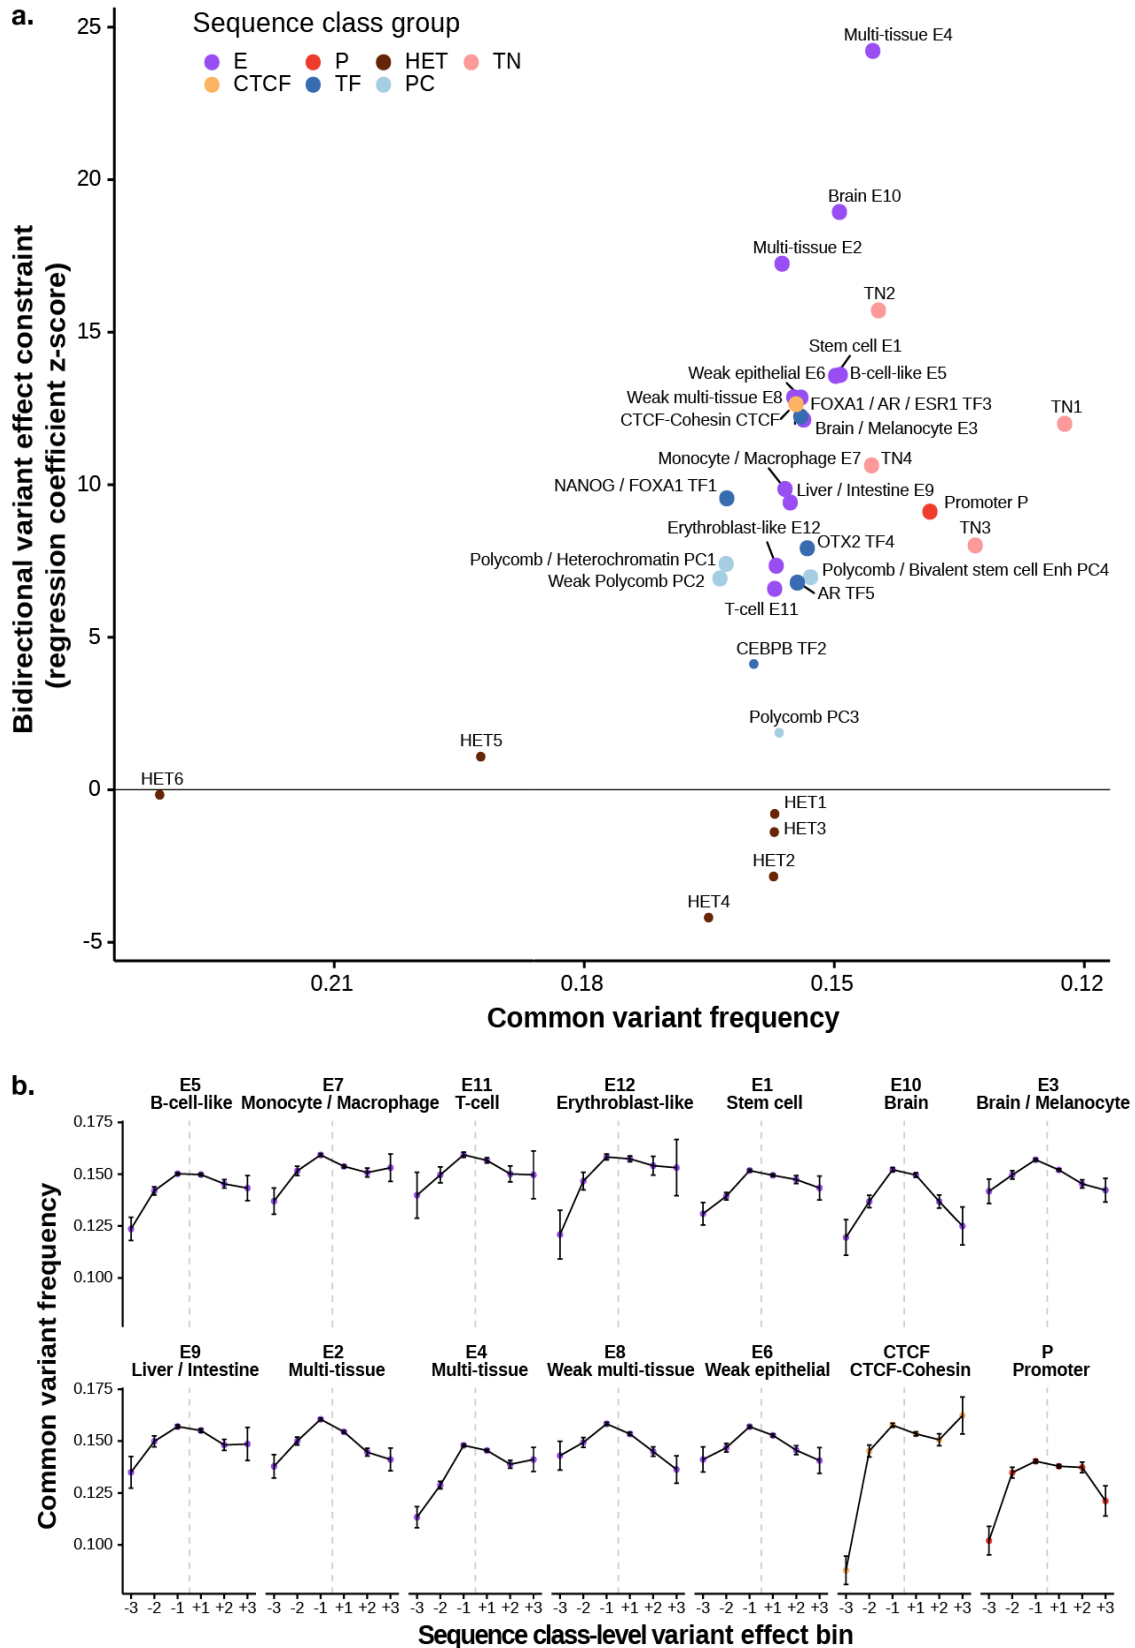

355 **Figure 3. Variants with strong regulatory sequence class effects show negative selection signatures.**  
356 **a**, Scatter plot for allele-frequency-based analysis of each sequence class. The x-axis shows 1 - common  
357 variant frequency (allele frequency > 0.01) across all 1000 Genome variants per sequence class, and the  
358 y-axis shows the bidirectional variant effect constraint z-score, which is computed based on logistic  
359 regressions predicting common variant (allele frequency > 0.01) from sequence-class-level variant effect  
360 score for both positive and negative effects (Methods). Sequence classes with significant (Bonferroni-  
361 Hochberg FDR<0.05) bidirectional variant effect constraint are indicated with larger dots. ‘L’ sequence  
362 classes are excluded due to lack of interpretation for their sequence-class-level variant effect scores. **b**,  
363 Comparison of common variant frequencies for 1000 Genomes variants assigned to different sequence  
364 classes and variant effect bins. The common variant threshold is >0.01 allele frequency across the 1000  
365 Genomes population. Error bars show +/- 1 standard error (SE). The sequence-class-level variant effects  
366 are assigned to 6 bins (+3: top 1% positive, +2: top 1%-10% positive, +1: top 10% -100% positive, -1: top  
367 10% -100% negative, -2: top 1%-10% negative, -3: top 1% negative).

368

369

### 370 **Sequence classes elucidate the tissue-specific regulatory architecture of GWAS traits**

371 The population allele frequency analysis on sequence classes suggest that variants perturbing  
372 regulatory sequence class activities are likely involved in human health and disease. Therefore,  
373 to explore this hypothesis, we used GWAS data to delineate the genetic contribution of each  
374 sequence class to diseases and traits.

375

376 Partitioned heritability from LD score regression (LDSR) has been a powerful tool for  
377 understanding the genetic architecture of diseases and traits using GWAS summary statistics<sup>29</sup>,  
378 including identifying enrichment of disease heritability in regulatory elements<sup>29,30</sup>. Previous  
379 applications of LDSR use overlapping annotations,<sup>29-31</sup> which allows for the joint analysis of  
380 heritability contribution across a wide range of annotations and has generated significant insight  
381 into a wide range of GWAS studies; however, such analyses cannot unambiguously partition  
382 heritability across annotations. Because sequence classes are both non-overlapping and cover  
383 nearly the entire genome, they provide a clear and more easily interpretable picture of the  
384 regulatory architecture of diseases and traits. To show this, we estimated the proportion of  
385 heritability explained by each sequence class for 47 GWAS traits in UK Biobank (UKBB)<sup>18,32</sup>  
386 (Methods). Specifically, we applied LDSR and used a conservative estimate of the proportion of  
387 heritability, subtracting one standard error and lower-bounding by 0. Our analysis of UKBB  
388 GWAS revealed genetic signatures of sequence-class-specific regulatory functions (Figure 4,  
389 Supplementary File 4).

390

391 Importantly, ‘E’ and ‘P’ sequence classes cover almost all classes that explain a high proportion  
392 of heritability for GWAS traits and diseases--the same sequence classes inferred to be under  
393 strong evolutionary constraints (Figure 3a, Supplementary File 4). We observed three main  
394 groups of traits that share similar heritability composition signatures across sequence classes.  
395 The first group is blood-related traits, which contains two subgroups of immune-related and non-  
396 immune-related traits. The majority of heritability signals in blood-related traits are explained by

397 enhancer classes for the relevant cell type(s), such as monocyte/macrophage enhancer (E7) for  
398 *Monocyte Count*, B-cell-like enhancer (E5) for *Auto Immune Traits*, and erythroblast-like (red  
399 blood cell progenitor) enhancer (E12) for *Red Blood Cell Distribution Width*, which measures  
400 the range of variation in red blood cell volume. Furthermore, autoimmune-related traits are  
401 selectively associated with the immune cell type enhancer sequence classes E5 (B-cell like), E11  
402 (T-cell), and E7 (monocyte/macrophage), while erythroblast-like enhancer E12 is specifically  
403 linked to red-blood-cell-related traits. Therefore, sequence classes can dissect the cell-type-  
404 specific regulatory architecture of traits and diseases with heritability decomposition, even  
405 without relying on gene-level information.

406  
407 Cognitive and mental traits (*Morning Person*, *Neuroticism*, *Smoking Status*, *Years of Education*,  
408 *College Education*) have similar sequence-class-level heritability decompositions as well; for  
409 this second group of traits, heritability was mostly explained by brain enhancer (E10 and E3) and  
410 stem cell enhancer (E1) sequence classes. The link to E1 is consistent with our observation that  
411 E1 was also moderately enriched for active enhancer mark H3K4me1 in brain cell types (Figure  
412 2a, Supplementary Figure 7) and is positively correlated with gene expression in brain tissues  
413 (Figure 2b).

414  
415 The third group of traits is intriguingly diverse, including *Balding*, *Lung Forced Vital Capacity*,  
416 *Waist-hip Ratio*, *Height*, and *Heel T-score*. The heritability of these traits are mostly explained  
417 by multi-tissue enhancer classes (E4, E2, and E8), which show activity in epithelial cells,  
418 fibroblast, muscle, and many other cell types. Enhancer activity across multiple tissues in the  
419 body may explain the diverse phenotypes that are associated with these traits.

420  
421 Beyond these three groups, there are a number of traits with unique heritability patterns that are  
422 also linked to highly relevant sequence classes. For example, the *High Cholesterol* trait was most  
423 associated with the liver and intestine enhancer sequence class (E9), which is consistent with the  
424 physiology of cholesterol metabolism and known etiology of this condition<sup>33</sup>. E9 was also linked  
425 to red-blood-cell-related traits, in line with the role of liver in erythropoiesis.

426  
427 Finally, the promoter sequence class P uniquely explained a sizable proportion of heritability in  
428 nearly all traits, suggesting a near-universal involvement of promoter sequence variations in all  
429 traits and diseases.

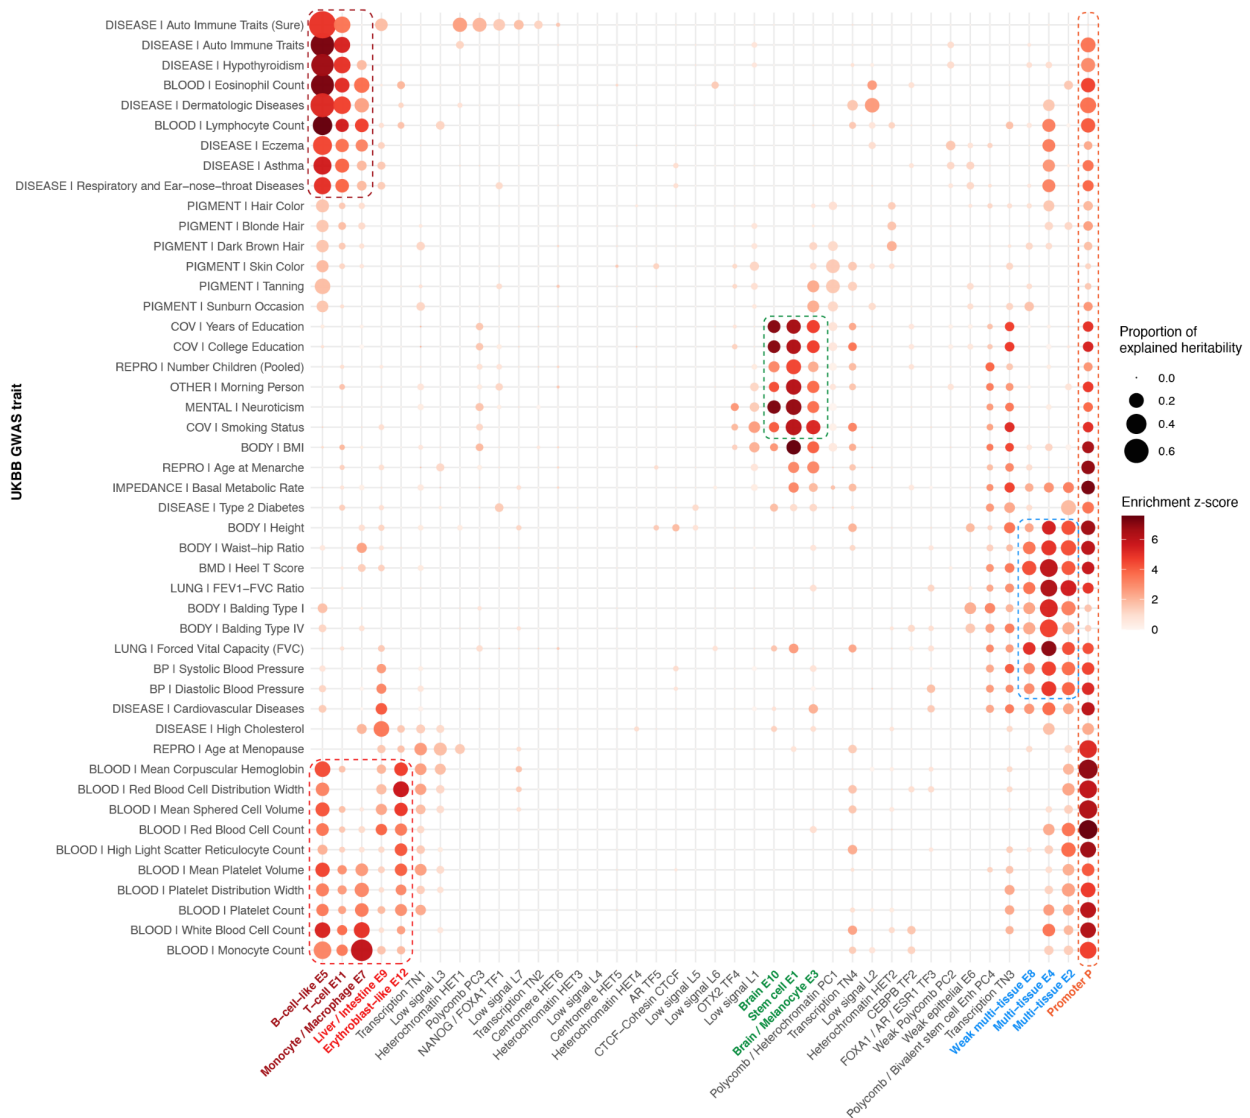

430  
 431 **Figure 4. Sequence-class-based partitioning of GWAS heritability shows trait associations with**  
 432 **tissue-specific regulation.** Partitioned genome-wide heritability in UKBB GWAS with all 40 sequence  
 433 classes. The size of the dot indicates the proportion of heritability estimated from LDSR, which is  
 434 conservatively estimated as one standard error below the estimated heritability proportion (bounded by 0).  
 435 The color of the dot indicates the significance z-score of the fold enrichment of heritability relative to the  
 436 proportion of all SNPs assigned to the sequence class (bounded by 0). Colored boxes indicate traits  
 437 associated with blood (red), brain (green), multiple tissues (blue) and promoters (orange).

438  
 439  
 440 We next assessed whether our new sequence classes could explain GWAS heritability beyond  
 441 that explained by annotations discovered in prior studies. To this end, we performed LDSR  
 442 analysis with our whole genome annotations of sequence classes conditioned on an up-to-date set  
 443 of previously identified baseline annotations (v2.2,  
 444 <https://alkesgroup.broadinstitute.org/LDSCORE/>). We uncovered 83 significant sequence-class-



445 trait associations with a corrected p-value cutoff of  $<0.05$  (Supplementary File 5). 70% of all  
446 UKBB GWAS traits and 9/13 of the E and P sequence classes have at least one significant  
447 association after multiple hypothesis testing correction (Supplementary File 5). This finding  
448 suggests that sequence classes can identify extensive new regulatory signals that enrich GWAS  
449 interpretation.

450

#### 451 **Disease mutations are predicted to disrupt the activities of sequence classes**

452 Sequence-class-level effects enable the prediction of specific regulatory mechanisms at the  
453 individual, pathogenic mutation level. To showcase our framework's capability to predict the  
454 mechanisms of individual mutations, we used Sei to predict the direction and magnitude of  
455 sequence-class-level mutation effects for all 853 regulatory disease mutations from the Human  
456 Gene Mutation Database (HGMD)<sup>34</sup>. For systematic classification and quantification of these  
457 mutations, we assign each mutation to an affected sequence class based on its mutation effects  
458 (the sequence class with the strongest score change) and the sequence that it alters (Methods).

459

460 Overall, the average variant effect score of disease mutations is 4.2x larger than the de novo  
461 mutations in healthy individuals (0.903 vs 0.217,  $p < 2.2e-16$ , Wilcoxon rank-sum test two-sided,  
462 max absolute effect across sequence classes) and 6.5x larger than the 1000 Genomes common  
463 variants with  $AF > 0.01$  (0.903 vs 0.139,  $p < 2.2e-16$ ). Here we focus on analyzing the mutations  
464 with the strongest predicted effects ( $>1.1$ ,  $n=138/853$ ), where predicted effect refers to the  
465 variant effect of the assigned sequence class for each mutation (Figure 5, Supplementary Figure  
466 18). Because sequence-class-level variant effects are directional--that is, predicting whether the  
467 alternative allele increases or decreases sequence-class level activity--we are able to discover that  
468 while the majority (~80%) of pathogenic mutations with strong predicted effects are predicted to  
469 decrease sequence class activity, the remaining 20% of HGMD pathogenic mutations are  
470 predicted to increase sequence class activity. Moreover, perturbations to E-, P-, and CTCF-  
471 classes make up >99% of the mutations with strong predicted effects on sequence class activity  
472 (Supplementary File 6): 44.9% are predicted to affect tissue-specific E sequence classes, 38.4%  
473 are predicted to affect the P promoter sequence class, and interestingly, 15.9% are predicted to  
474 affect the CTCF-cohesin sequence class (Methods).

475

476 We found that almost all mutations with strong predicted effects in cell-type-specific E sequence  
477 classes contributed to diseases relevant to that same cell type (Figure 5, Supplementary File 6)--  
478 for most of these mutations, the nearby gene is known to be relevant to the disease but the  
479 molecular mechanisms of regulatory disruption is unknown. For example, mutations causing  
480 Protein C deficiency and Hemophilia B, two diseases characterized by the deficiency of specific  
481 plasma proteins produced in the liver (protein C and coagulation factor IX, respectively), are  
482 predicted to decrease E9 liver/intestine sequence class activities. Blood cell-type-specific  
483 enhancer sequence classes are disrupted in distinct blood-related diseases and deficiencies  
484 relevant to the corresponding cell type: the E12 erythroblast-like enhancer sequence class is

485 disrupted in red blood cell-specific diseases such as pyruvate kinase deficiency, erythropoietic  
486 porphyria, delta-thalassemia, and beta-thalassemia; the E7 monocyte/macrophage-like sequence  
487 class is disrupted in monocyte and macrophage-related chronic granulomatous disease; and the  
488 E5 B-cell-like enhancer sequence class is disrupted in X-linked agammaglobulinemia, a  
489 functional deficiency of B-cell. For developmental diseases, such as preaxial polydactyly  
490 triphalangeal thumb and radial ray deficiency and triphalangeal thumb-polysyndactyly  
491 syndrome, the E1 embryonic stem cell-specific enhancer sequence class is predicted to be  
492 disrupted by mutations in a known distal enhancer of Sonic Hedgehog (SHH) (chr7:156583951  
493 G>A<sup>35</sup>, chr7:156583949 G>C<sup>36</sup>), a gene that plays a crucial role in the positioning and growth of  
494 limbs, fingers, and toes during development.

495  
496 In addition, 38% of the regulatory mutations with strong predicted effects affect the activity of  
497 the promoter sequence class P, including a hypercholesterolemia mutation near the LDLR gene  
498 (chr19:11200089 C>T<sup>37</sup>), a microcephaly & developmental delay mutation near the PIGY gene  
499 (chr4:89444948 C>T<sup>38</sup>), and a retinoblastoma mutation near the RB1 gene (chr13:48877851  
500 G>T<sup>39</sup>). The high proportion of mutations perturbing the P sequence class likely reflects both the  
501 critical role of promoters in diseases and the emphasis on promoter-proximal mutations in past  
502 studies.

503  
504 While the mutations we've discussed thus far are negative effect mutations which decrease  
505 sequence class activity, 20% of HGMD pathogenic mutations are predicted to increase sequence  
506 class activity. Indeed, these mutations included many known gain-of-function mutations, which  
507 validated our predictions. The highest increase in sequence class activity was observed for a  
508 mutation (chrX:73072592 G>C) near the XIST gene that skews X-inactivation of the mutant  
509 chromosome in females<sup>40</sup>; this mutation was predicted to increase the activity of the CTCF  
510 sequence class and has been experimentally validated to increase CTCF binding<sup>41</sup>. Similarly,  
511 positive effect predictions for 'E' and 'P' sequence classes were also validated by previously  
512 studied mutations: an alpha-thalassemia mutation near the HBM gene (chr16:209709 T>C<sup>42</sup>)  
513 known to create a GATA1 binding site and increase intergenic transcription was predicted to  
514 increase the activity of the erythroblast-specific E12 sequence class, and a TERT gene mutation  
515 found in individuals with familial melanoma (chr5:1295161 T>G<sup>43</sup>) was predicted to increase the  
516 activity of P. Beyond this, many mutations predicted to have strong positive effects were not  
517 previously understood. For example, a mutation near the HBG1 gene (chr11:5271262 A>G<sup>44</sup>)  
518 that causes persistence of fetal hemoglobin is also predicted to increase the activity of the  
519 erythroblast-specific E12 sequence class. Previously, this mutation was known to create an  
520 ATGCAAAT octamer<sup>44</sup> that matches the POU family transcription factor motif, but its  
521 functional consequences were unclear.

522  
523 Notably, even though pathogenic mutations from prior genetics studies are subjected to selection  
524 bias, the observation of pathogenic mutations with strong impacts on E-, P-, and CTCF-



540 **Figure 5. Disease regulatory mutations are predicted to disrupt promoter, CTCF, and tissue-**  
541 **specific enhancer sequence classes.** Sequence-class-level mutation effects of pathogenic noncoding  
542 HGMD mutations are plotted. A polar coordinate system is used, where the radial coordinate indicates the  
543 sequence-class-level effects. Each dot represents a mutation, and mutations inside the circle are predicted  
544 to have positive effects (increased activity of sequence class), while mutations outside of the circle are  
545 predicted to have negative effects (decreased activity of sequence class). Dot size indicates the absolute  
546 value of the effect. Mutations are assigned to sequence classes based on their sequences and predicted  
547 effects (Methods). Within each sequence class, mutations are ordered by chromosomal coordinates. The  
548 associated disease and gene name are annotated for each mutation, and only the strongest mutation is  
549 annotated if there are multiple mutations associated with the same disease, gene, and sequence class.

550

551

## 552 **Discussion**

553 We developed a genome-wide sequence-based map of regulatory activities using sequence  
554 classes, a vocabulary for genomic sequence activities discovered using a data-driven, systematic  
555 method. Our deep-learning-based framework uses a compendium covering 21,907 publicly  
556 available cis-regulatory profiles and the whole genome sequence to create a mapping from any  
557 sequence to a comprehensive set of sequence classes. This provides a global sequence-based  
558 view of sequence regulatory activities and allows for the quantitative prediction of variant effects  
559 on sequence class activities. Sequence classes are a concise vocabulary of regulatory activities  
560 that is interpretable, quantifiable, and easily analyzed globally (across all sequence classes) and  
561 individually. To our knowledge, it is the first such attempt to systematically map regulatory  
562 activities from any sequence.

563

564 We demonstrated that E- and P- sequence classes are strongly enriched in trait and disease  
565 GWAS heritability and under evolutionary constraints. Importantly, sequence classes provide  
566 insights into the mechanisms of individual pathogenic mutations by predicting effects on the  
567 function of tissue-specific enhancers, promoter activity, and long-range genome interactions (e.g.  
568 CTCF-cohesin sequence class). Using sequence-class-level variant effect predictions, we linked  
569 many pathogenic mutations to tissue-specific regulatory changes in the relevant tissues. These  
570 predictions point to potential mechanisms that can be experimentally tested in the future.

571

572 Sequence classes leverage a sequence model trained on most publicly available cis-regulatory  
573 profile data; however, there remains substantial space for improvement as more data becomes  
574 available. For example, we are still lacking data for many cell types, developmental stages,  
575 transcription factors, and combinations of chromatin targets measured in new cell types or  
576 conditions. More data that covers currently undercharacterized cell types and developmental  
577 stages will likely enable the identification of still more cell-type-specific and developmental  
578 stage-specific sequence classes, defining sequence classes with increasingly fine-grained  
579 regulatory resolution. Furthermore, development of new computational methods to define, for  
580 example, hierarchical or combinatorial representations of sequence classes may be needed to

581 make such fine-grained classes easy to interpret and use. Because interpretability and robustness  
582 were our major goals in designing sequence classes, we chose to use clustering to generate the  
583 sequence classes and a linear projection step to compute corresponding scores. It is conceivable  
584 that a more expressive model such as an end-to-end neural network can further improve  
585 sequence class predictions, and we expect that increasing the expressiveness of the model while  
586 maintaining interpretability and robustness will be an interesting future challenge.

587  
588 This work demonstrates the potential of sequence classes to discover regulatory disruptions in  
589 human diseases, through both the aggregation of genome-wide variant association signals and  
590 prediction of the impact of individual mutations. We provide sequence classes and the Sei model  
591 as a resource for further research into understanding the regulatory genetic landscape of human  
592 health and diseases. Our framework is applicable to any variant, regardless of whether it is  
593 common, rare, or never previously observed, and we expect it to be a powerful tool for  
594 understanding the mechanistic effects of noncoding mutations in human health.

595

## 596 **Methods**

597

### 598 **Training data**

599 21,907 cis-regulatory profiles in peak format were compiled from the processed files of the  
600 Cistrome<sup>5</sup>, ENCODE<sup>3</sup>, and Roadmap Epigenomics projects<sup>4</sup>. The Cistrome Project, which  
601 systematically processed publicly available cis-regulatory profiles, contributed the majority of  
602 the profiles predicted in Sei (19,905). We excluded profiles from Cistrome with less than 1000  
603 peaks. Genome sequences are from the GRCh38/hg38 human reference genome. The full list of  
604 cis-regulatory profiles is available in Supplementary File 1.

605

### 606 **Deep learning sequence model training**

607 The Sei model is trained to predict 21,907 transcription factor binding, histone marks, and DNA  
608 accessibility from cis-regulatory profile peaks at the center of 4kb sequences.

609

610 The model architecture is composed of three sequential sections: 1) a convolutional network with  
611 dual linear and nonlinear paths, 2) residual dilated convolution layers, 3) spatial basis function  
612 transformation and output layers. A detailed specification of the model is available in  
613 Supplementary File 7 and in the code repository (<https://github.com/FunctionLab/sei-framework>,  
614 downloadable from <https://doi.org/10.5281/zenodo.4906996>). In the convolutional architecture,  
615 we introduced a new design composed of both linear and nonlinear convolution blocks. The  
616 nonlinear blocks are composed of convolution layers and rectified linear activation functions  
617 (ReLU), similar to regular convolutional networks. The linear blocks have the same structure as  
618 the nonlinear blocks but do not include activation functions to facilitate learning of linear  
619 dependencies. Each nonlinear block is stacked on top of a linear block with a residual connection  
620 adding the input of the nonlinear block to the output, allowing the computation to go through



621 either the linear or nonlinear path. Dilated convolutional layers with residual connections further  
622 expands the receptive fields without reducing spatial resolution. Finally, spatial basis functions  
623 are used to reduce dimensionality of the spatial dimension while preserving the capability to  
624 discriminate spatial patterns of sequence representations. Specifically, in the Sei model, a B-  
625 spline basis matrix (256x16) with 16 degrees-of-freedom across 256 uniformly-spaced spatial  
626 bins is generated and multiplied with the convolutional layers output to reduce the 256 spatial  
627 dimensions to 16 spline basis function dimensions. After the spline basis function  
628 transformation, a fully-connected layer and an output layer are used for integrating information  
629 across the whole sequence and generating the final 21,907-dimensional predictions.

630  
631 Training, validation, and testing datasets are specified by different sets of chromosomes in the  
632 hg38 genome (holding out chromosome 8 and 9 for the test set and chromosome 10 for the  
633 validation set), and samples drawn uniformly across the hg38 genome for these partitions,  
634 excluding regions specified in the ENCODE blacklist<sup>45</sup>. For training, we sampled training  
635 sequences and their labels on-the-fly from the training set of chromosomes using Selene<sup>46</sup>. As a  
636 result, almost all training samples are drawn from unique genomic intervals with distinct start  
637 and end positions to reduce overfitting during the training process. For each 4kb region, a  
638 21,907-dimensional binary label vector is created for the 21,907 cis-regulatory profiles based on  
639 whether the center basepair overlaps with a peak in each of the profiles. The model is  
640 implemented in PyTorch and trained with Selene. A detailed training configuration file is  
641 available at <https://github.com/FunctionLab/sei-framework/blob/main/train/train.yml>.

642

### 643 **Model performance**

644 We computed the AUROC and AUPRC for all cis-regulatory profiles predicted by Sei on the test  
645 holdout dataset, excluding profiles that had fewer than 25 positive samples in the test set.  
646 Additionally, to assess the correlation structure of the predictions, we compared the rank-  
647 transformed pairwise Spearman's rank correlations for the predicted cis-regulatory profiles to the  
648 pairwise correlations for the true labels (peak calls provided in Cistrome DB).

649

650 The model performance comparison between DeepSEA and Sei is computed on the 2,002 cis-  
651 regulatory profiles from Roadmap and ENCODE that both DeepSEA and Sei predict. Because  
652 both models have the same chromosomal test holdout (chr8 and chr9), we use the regions  
653 specified in the DeepSEA test holdout set to create a common test dataset of sequences and  
654 labels on which to evaluate the models.

655

### 656 **Sequence classes**

657 We selected 30 million genomic positions that uniformly tile the genome with 100bp step size  
658 and then computed Sei predictions for 4kb sequences centered at each position. Sequences  
659 overlapping with ENCODE blacklist regions<sup>45</sup> or assembly gaps ("N"s) are removed. To process  
660 the 30 million x 21,907 predictions matrix, the dimensionality is first reduced with principal



661 component analysis (PCA). The PCA transformations were fitted with incremental PCA using a  
662 batch size of 1,000,000 for one pass of the whole dataset, and genomic positions were randomly  
663 assigned to batches. The top 180 principal components, scaled to unit variance, were used for  
664 constructing a nearest neighbor graph where each node is connected to its k-nearest neighbors by  
665 Euclidean distance (k=14). Louvain community clustering with default parameters was applied  
666 to the nearest neighbor graph with the python-louvain package, which resulted in 61 clusters. We  
667 refer to the largest 40 clusters as sequence classes and exclude the remaining (smallest) 21  
668 clusters, which constitute <2.6% of the genome, from our analyses due to their size. These 21  
669 clusters mainly display Low signal or Heterochromatin like enrichment (Supplementary Figure  
670 19). We refer to this cluster assignment to sequence classes at 100bp resolution as sequence class  
671 annotations. We visualized the genome-wide predictions by computing UMAP embedding with a  
672 subsample of PCA-transformed Sei predictions of 30 million sequences, and then fine-tuned the  
673 visualization with OpenTSNE. The detailed procedures are available in our code repository  
674 (<https://github.com/FunctionLab/sei-manuscript>).

675

### 676 **Sequence class scores**

677 Each sequence class is represented as a unit vector in the 21,907-dimensional cis-regulatory  
678 profile space, in the direction of the average prediction of all sequences assigned to this sequence  
679 class among the 30 million. In more formal notation, the vector for sequence class  $i$  is  $v_i =$

680  $\frac{\overline{p_{s \in \text{Sequence class } i}}}{\|p_{s \in \text{Sequence class } i}\|_2}$ , where  $p_s$  represents the 21,907-dimensional Sei prediction for sequence  $s$ .

681 Each Sei prediction can then be projected onto any sequence class vector to obtain a sequence  
682 class-level representation of the prediction, which we call sequence class score or  $score_{s,i} = p_s \cdot$   
683  $v_i^T$ . In addition, predicted sequence-class-level variant effects are represented by the difference  
684 between the sequence class scores of the sequences carrying the reference allele and the  
685 alternative allele, or  $score_{v,i} = score_{alt,i} - score_{ref,i}$ . To better represent predicted variant  
686 effects on histone marks, it is necessary to normalize for the nucleosome occupancy (e.g. loss-of-  
687 function mutation near TSS can decrease H3K4me3 modification level while increasing  
688 nucleosome occupancy, resulting in an overall increase in observed H3K4me3 quantity).  
689 Therefore, for variant effect computation, we use the sum of all histone profile predictions as an  
690 approximation to nucleosome occupancy and adjust all histone mark predictions to remove the  
691 impact of nucleosome occupancy change (non-histone mark predictions are unchanged):

692 
$$p^{hm*} = p^{hm}_{ref} \frac{\sum_k p^{hm^k}_{ref} + \sum_k p^{hm^k}_{alt}}{\sum_k p^{hm^k}_{ref}}; p^{hm*} = p^{hm}_{alt} \frac{\sum_k p^{hm^k}_{ref} + \sum_k p^{hm^k}_{alt}}{\sum_k p^{hm^k}_{alt}}$$

693 where  $\sum_k p^{hm^k}_{ref}$  represents the sum over all histone mark predictions (among 21907-  
694 dimensions of a prediction) for the reference allele. We generally exclude Low Signal sequence  
695 classes in sequence-class-level variant effect analyses because they lack an intuitive biological  
696 interpretation.

697

### 698 **Sequence class enrichment of chromatin profiles and genome annotations**

699 We computed the log fold change enrichment of various chromatin profiles and genome  
700 annotations for each sequence class based on sequence class annotations (described above, see  
701 ‘Sequence classes’). Log fold change enrichment is computed by taking the log ratio of the  
702 proportion of a sequence class intersecting with the annotation versus the background proportion  
703 of the annotation, where we consider all regions assigned to any sequence class. We computed  
704 enrichment for all 21,907 profiles predicted by Sei, filtered the chromatin profiles for each  
705 sequence class to only those having Benjamini-Hochberg corrected p-values (Fisher’s exact test,  
706 two-sided) below  $2.2e-16$ , and selected the top 25 profiles based on log fold change enrichment.  
707 Cistrome Project profile enrichment is computed over 2 million random genomic positions.

708  
709 The annotation of centromere repeats is obtained from the UCSC RepeatMasker track, and  
710 annotations of histone marks over multiple cell types are obtained from the Roadmap  
711 Epigenomics project--enrichments for both of these sets of annotations are computed over the  
712 entire genome. In addition, we obtained ChromHMM chromatin states from ENCODE<sup>3</sup> and  
713 tissue and cell-type-specific DHS vocabulary from<sup>25</sup>.

714

#### 715 **Enhancer sequence class correlations with cell-type-specific gene expression**

716 Tissue expression profiles are from GTEx<sup>26</sup>, Roadmap Epigenomics<sup>4</sup>, and ENCODE<sup>3</sup> and  
717 transformed to log-scale RPKM (reads per kilobase per million reads mapped) scores as  
718 previously described<sup>13</sup> and normalized by tissue-average. Specifically, a pseudocount was added  
719 before log transformation (0.0001 for GTEx tissues, which are averaged across individuals, and  
720 0.01 for Roadmap and ENCODE tissues). After log transformation, the average scores across  
721 tissues were subtracted for each gene; as a result, the processed scores represent log fold change  
722 relative to tissue-average.

723

724 Gene-wide expression prediction is evaluated on sequence class annotations (from Louvain  
725 community clustering) for positions within +/-10kb of the TSSs for these genes. For each  
726 enhancer sequence class and tissue, we compute the Spearman correlation between the sequence  
727 class annotation coverage and gene expression.

728

#### 729 **Correlation between regulatory sequence class variant effects and directional eQTL 730 variant effect sizes**

731 We collected the eQTLs within +/-5kb of gene TSSs from GTEx v8, combined across all GTEx  
732 tissues, and computed the Spearman correlation between the top 15k variant effect predictions  
733 for each sequence class and the eQTL variant effect sizes (averaged across multiple tissues if the  
734 variant is an eQTL in multiple tissues). The p-values are derived from the Spearman’s rank  
735 correlation test (two-sided) and BH correction is applied. Low Signal and Heterochromatin  
736 sequence classes are excluded from this analysis due to lack of interpretation for their variant  
737 effect scores in this context.

738

739 Additionally, we collected fine-mapped GTEx eQTLs from eQTL Catalogue<sup>27</sup> and obtained  
740 sequence class scores for eQTLs with posterior inclusion probability > 0.95. Variants are  
741 assigned to sequence classes based on the sequence class annotation for the reference genome  
742 (i.e. variants are not further selected based on variant effect predictions). For each sequence  
743 class, we computed the Spearman correlation between the sequence class scores and the eQTL  
744 variant effect sizes in the same way we describe above.

745

#### 746 **Evolutionary constraints on variant effects**

747 We computed sequence-class-level variant effects for all 1000 Genomes project phase 3  
748 variants<sup>28</sup>. Variants are assigned to sequence classes based on the 100bp resolution genome-wide  
749 assignment derived from Louvain community clustering as described above. For each sequence  
750 class we divide variants into 6 bins based on their effects in the same sequence class as  
751 illustrated in Figure 3, and summarize common variant (AF>0.01) frequencies in each bin by  
752 mean and standard error of the mean. We also estimated statistical significance of allele  
753 frequency dependency on sequence-class-level variant effects. For each sequence class, we  
754 applied logistic regression separately for positive effect and negative effect variants, to predict  
755 common variants (AF>0.01) from the absolute value of sequence-class-level variant effect score,  
756 and obtained the significance z-score of the regression coefficient of variant effect. The  
757 bidirectional evolutionary constraint z-score is defined as the negative value of the combined z-  
758 scores from positive and negative effect variants with Stouffer's method.

759

#### 760 **Partitioning GWAS heritability by sequence classes**

761 UKBB GWAS summary statistics were obtained from<sup>18</sup>. To study the association of sequence  
762 class genome annotation and sequence class variant effects and trait heritability, we performed  
763 partitioned heritability LD score regression (LDSR) as described in<sup>29</sup>. To partition the  
764 heritability as sums of heritability explained by each sequence class, we run LDSR with only  
765 sequence class annotations and a baseline all-ones annotation. We obtained the estimated  
766 proportion of  $h^2$  explained by each sequence class and its standard error with LDSR as  
767 implemented in <https://github.com/bulik/ldsc>. As the estimated proportions can have high  
768 variance or even be negative (the true value of heritability explained can only be non-negative),  
769 we use a robust and conservative estimator which is the estimated proportion of  $h^2$  subtracted by  
770 one standard error, then lower-bounded by zero (the standard error of the estimated proportion of  
771  $h^2$  explained is given by LDSR and estimated with the block jackknife procedure as described in  
772 <sup>29</sup>).

773

774 To assess the contribution of sequence classes to explaining additional heritability when  
775 conditioned on known baseline annotations, we also run LDSR with the baseline annotations  
776 (v2.2, <https://alkesgroup.broadinstitute.org/LDSCORE/>). The p-values are derived from the  
777 coefficient z-score, and BH correction is applied.

778

## 779 **Sequence class-level variant effect analysis of noncoding pathogenic mutations**

780 We obtained all mutations assigned “DM” and “regulatory” annotation in the Human Gene  
781 Mutation Database (HGMD) database (2019.1 release). RMRP gene mutations are excluded  
782 because they are likely pathogenic due to impacting RNA function instead of regulatory  
783 perturbations, despite being annotated to the regulatory category in HGMD. For every mutation,  
784 we predicted the sequence class scores for both the reference and the alternative allele and  
785 computed the sequence-class-level variant effect as the predicted scores for the alternative allele  
786 subtracting the scores for the reference allele. To provide an overview of sequence-class level  
787 effects of human noncoding pathogenic mutations, mutations are first assigned to sequence  
788 classes based on the sequence class annotations of the mutation position. For mutations with a  
789 strong effect in a different sequence class than the originally assigned sequence class (absolute  
790 value higher than the original sequence class by  $>1$  absolute difference and  $>2.5$  fold relative  
791 difference), we reassign the mutation to the sequence class with the strongest effects.

792

## 793 **Code and data availability**

794 The Sei framework code is provided in <https://github.com/FunctionLab/sei-framework>, and the  
795 model and associated data files downloadable by following the instructions in the GitHub  
796 repository. Code and data for the manuscript results are available at  
797 <https://github.com/FunctionLab/sei-manuscript>.

798

## 799 **Acknowledgements**

800 The authors acknowledge all members of the Troyanskaya lab for helpful discussions. This work  
801 was performed using the high-performance computing resources, supported by the Scientific  
802 Computing Core, at the Flatiron Institute and the Terascale Infrastructure for Groundbreaking  
803 Research in Science and Engineering high-performance computer center at Princeton University.  
804 K.M.C. is supported by the National Science Foundation Graduate Research Fellowship Program  
805 (NSF-GRFP). O.G.T. is supported by National Institutes of Health grant nos. R01HG005998,  
806 U54HL117798 and R01GM071966, U.S. Department of Health and Human Services grant no.  
807 HHSN272201000054C and Simons Foundation grant no. 395506. O.G.T. is a senior fellow of  
808 the Genetic Networks program of the Canadian Institute for Advanced Research. J.Z. is  
809 supported by the Cancer Prevention and Research Institute of Texas grant (RR190071), National  
810 Institutes of Health grant DP2GM146336, and the UT Southwestern Endowed Scholars program.

811

## 812 **Author Contributions**

813 K.M.C. and J.Z. conceived the Sei framework, developed the computational methods, and  
814 performed the analyses. A.K.W. developed the Sei web server. K.M.C., J.Z., and O.G.T. wrote  
815 the manuscript.

816

817

818



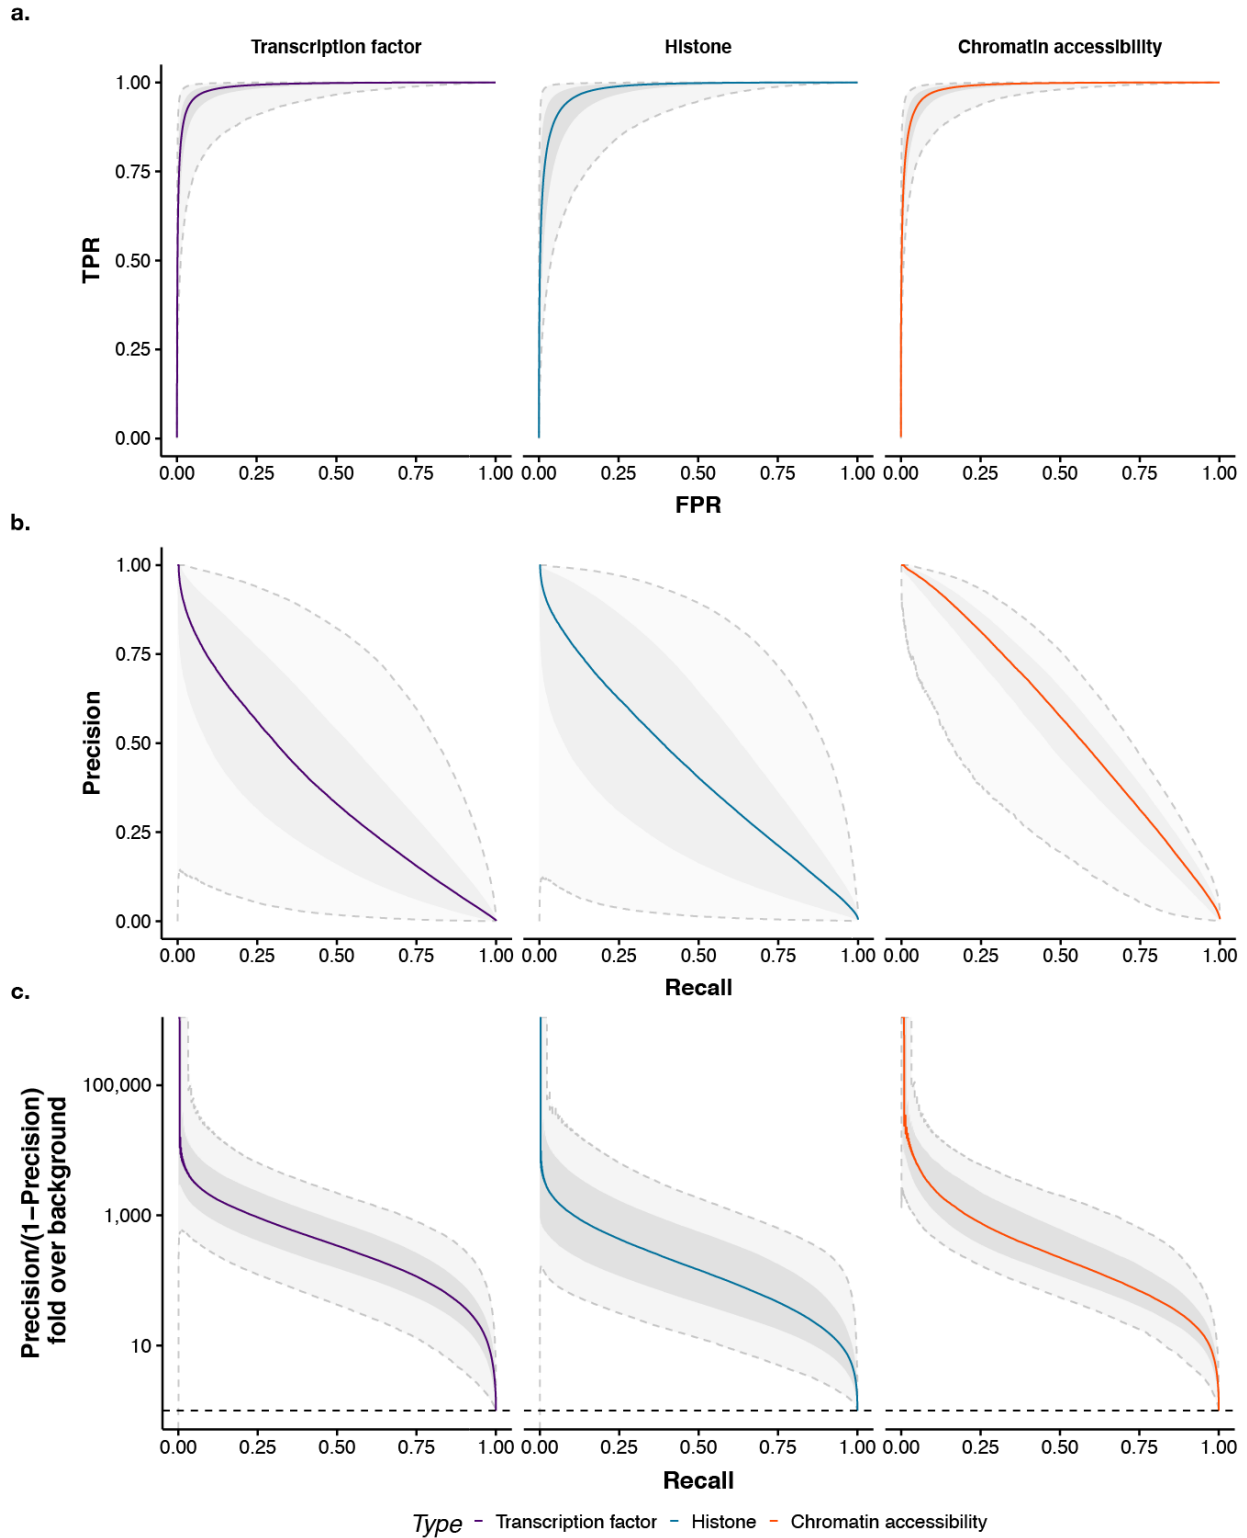

824  
825  
826  
827

**Supplementary Figure 2. Sei model performance on predicting 21907 cis-regulatory profiles on holdout chromosomes.**



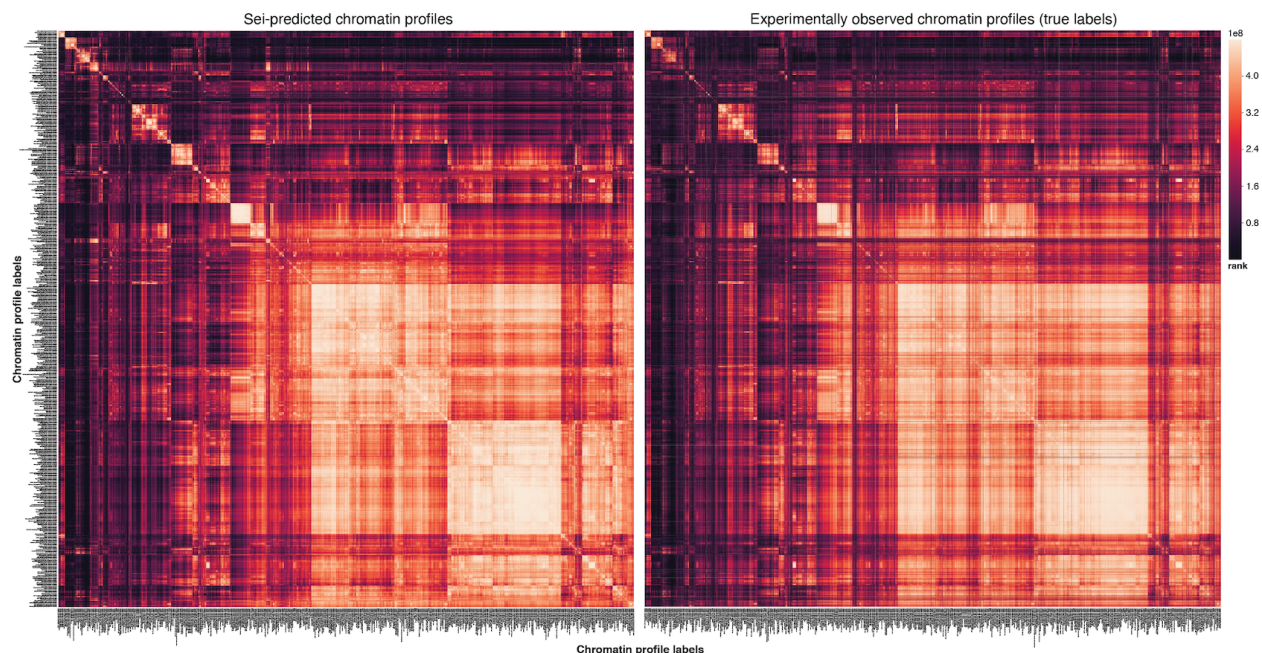

828  
829 **Supplementary Figure 3. Visualizing the rank-transform of pairwise Spearman correlations for the**  
830 **21,907 cis-regulatory profiles in Sei.** Sei model predictions share a highly similar correlation structure  
831 with the experimental observations.  
832

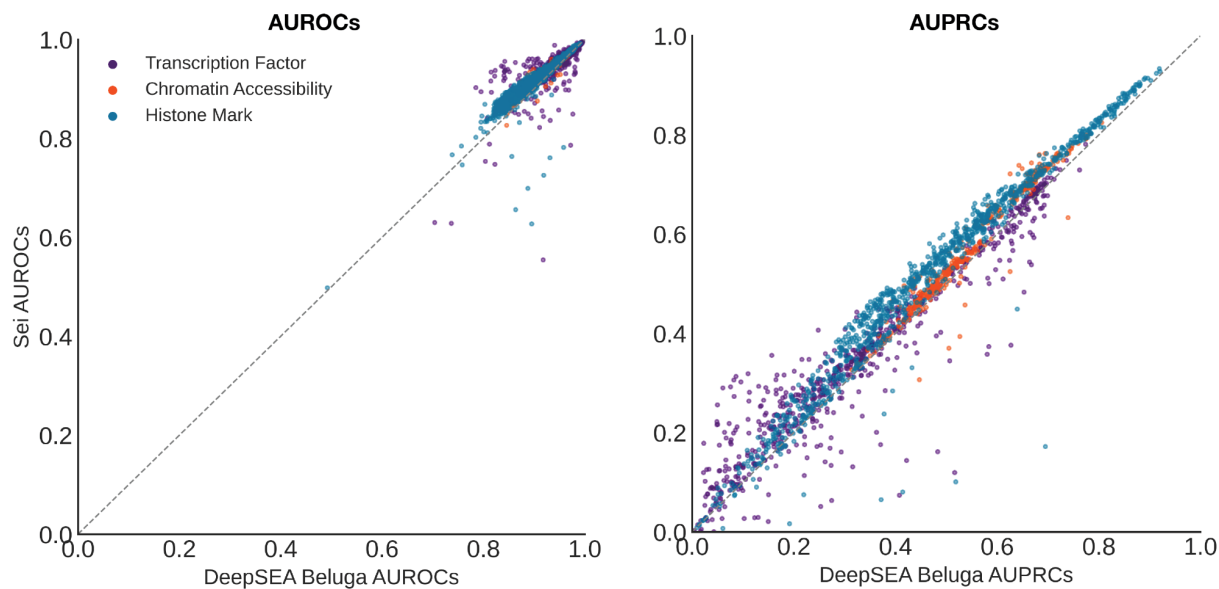

833  
834 **Supplementary Figure 4. Sei model performance comparison with DeepSEA.** Performance on the  
835 shared 2002 DeepSEA “Beluga” (2018) cis-regulatory profiles are compared.  
836

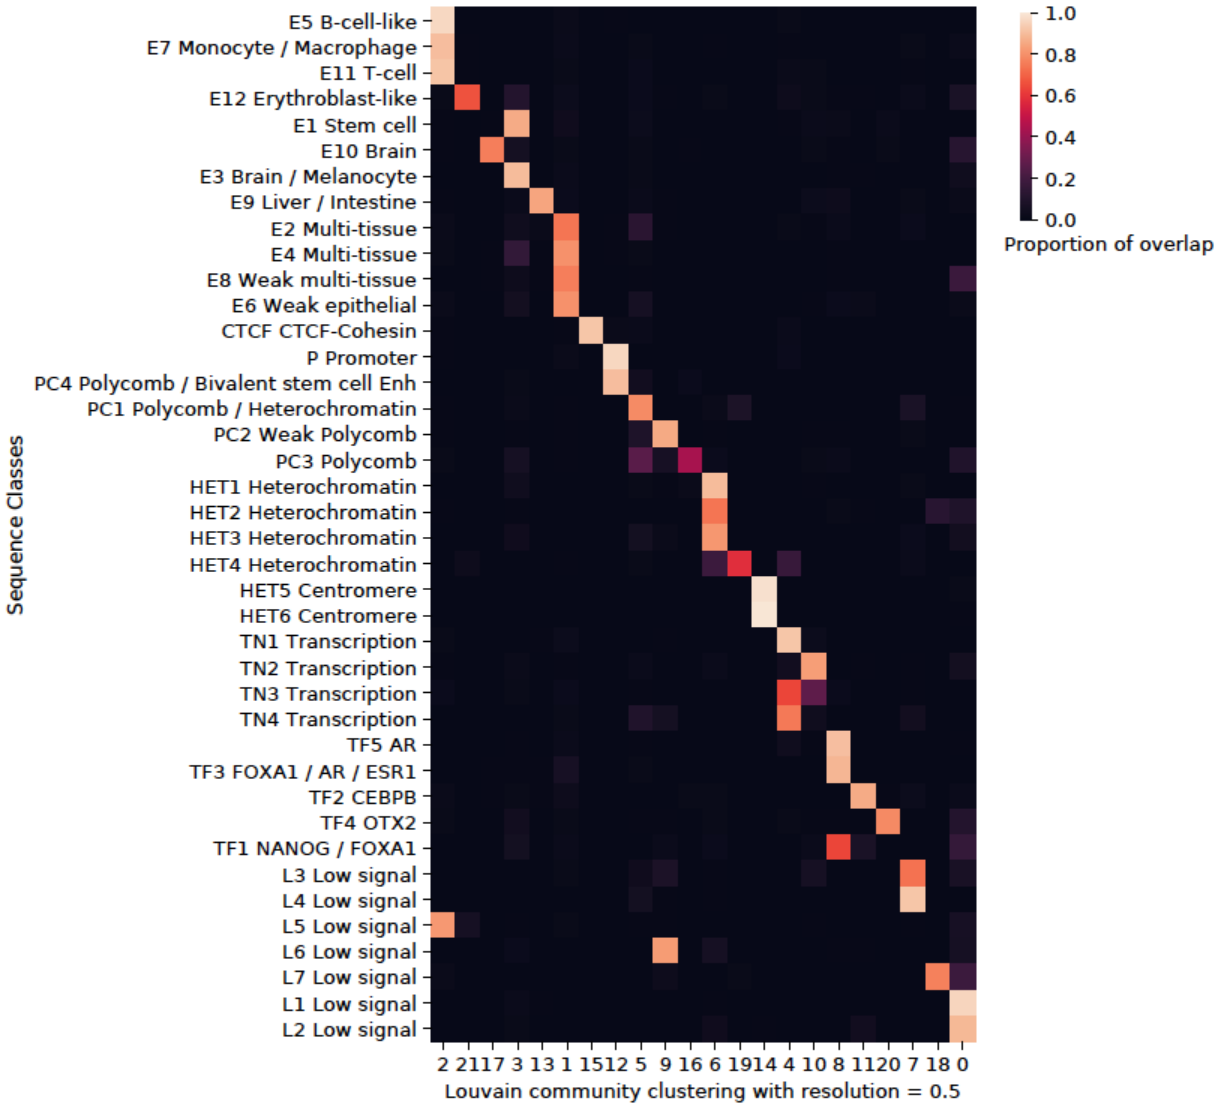

837

838

**Supplementary Figure 5. Comparison of sequence classes and Louvain community clustering with**

839

**resolution = 0.5.** For each sequence class, the proportion overlap was computed between sequence

840

classes and a lower resolution clustering for Louvain community clustering. The lower resolution

841

clustering is largely consistent with the original sequence classes, with some clusters combining several

842

related enhancer sequence classes into one.

843

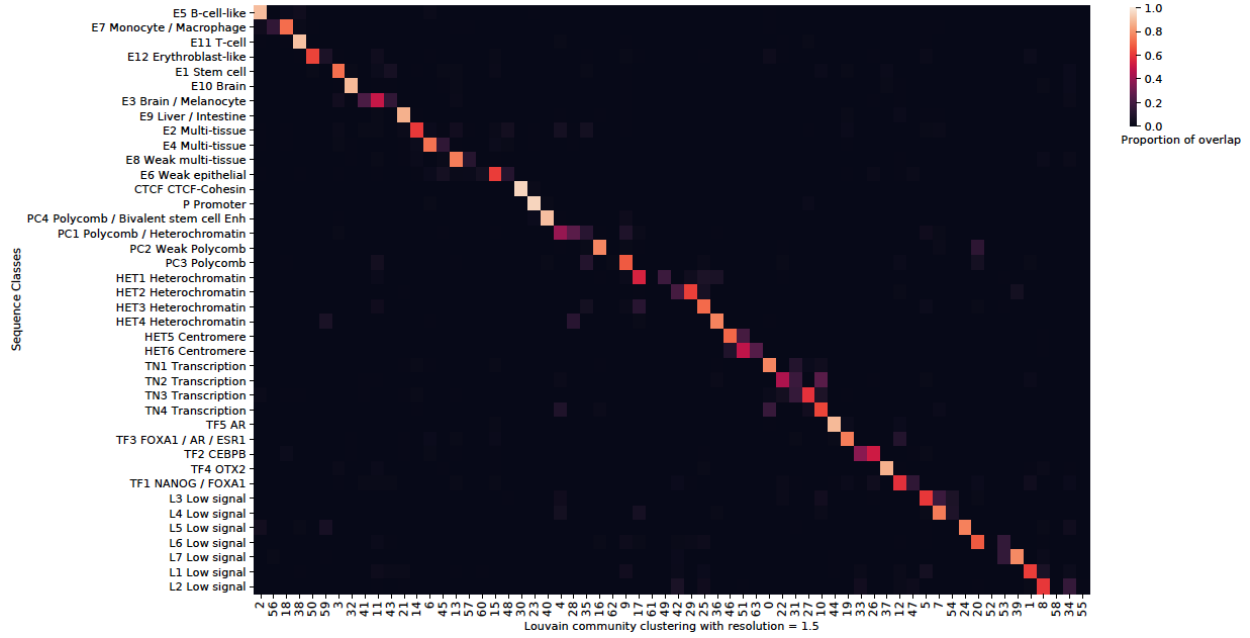

844  
845 **Supplementary Figure 6. Comparison of sequence classes and Louvain community clustering with**  
846 **resolution = 1.5.** For each sequence class, the proportion overlap was computed between sequence  
847 classes and a higher resolution clustering for Louvain community clustering. The higher resolution  
848 clustering closely resembles the current sequence class clusters.  
849

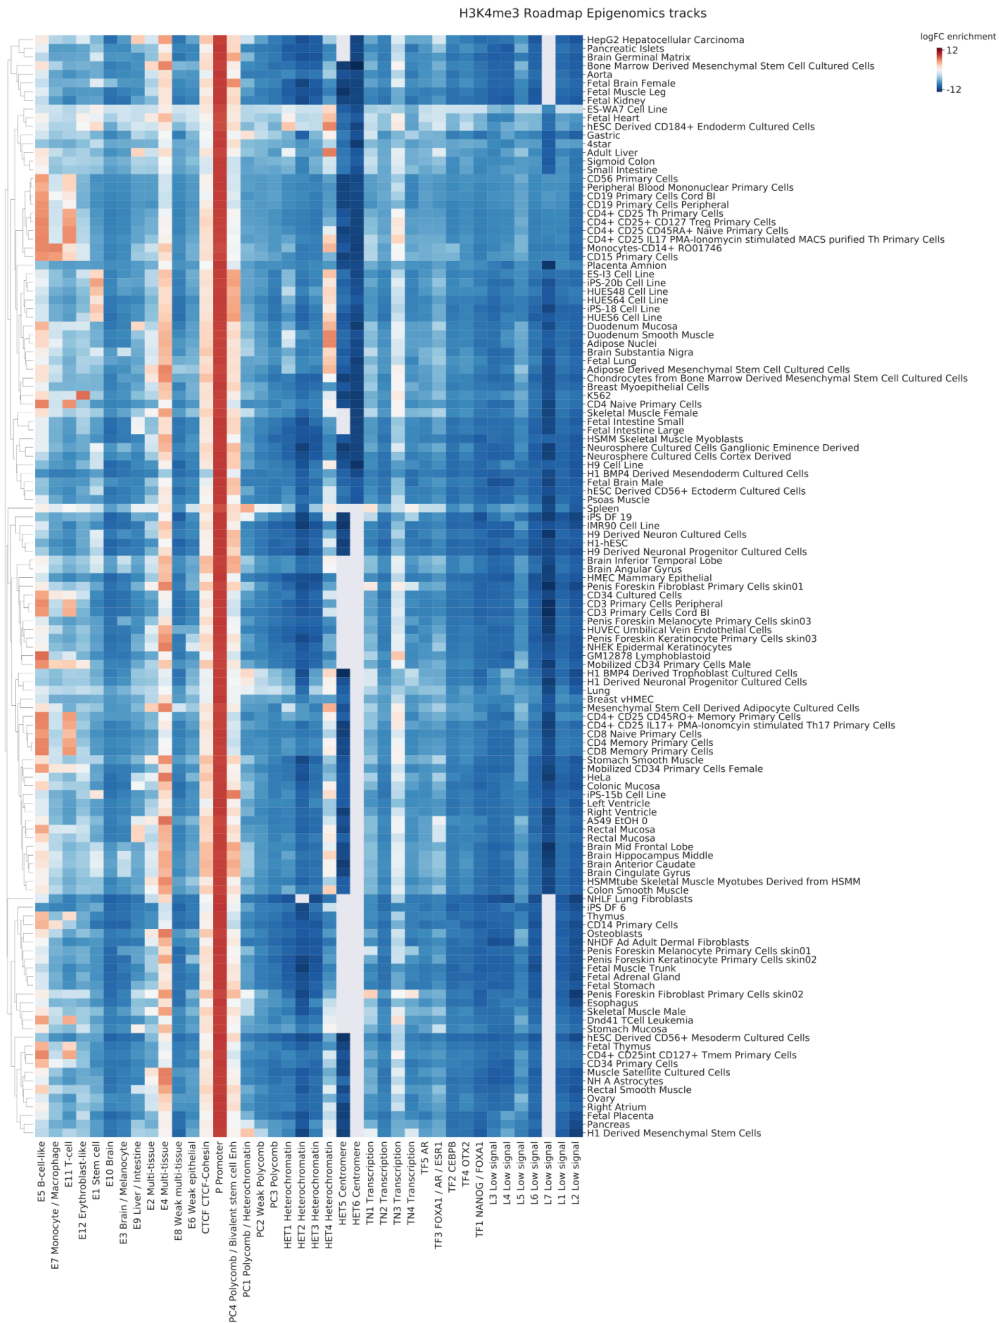

850

851 **Supplementary Figure 7. Enrichment of tissue/cell type-specific H3K4me3 (promoter mark)**

852 **profiles in sequence classes. Log fold change enrichment over genome-average background is shown in**

853 **the heatmap. No overlap is indicated by the gray color in the heatmap.**

854

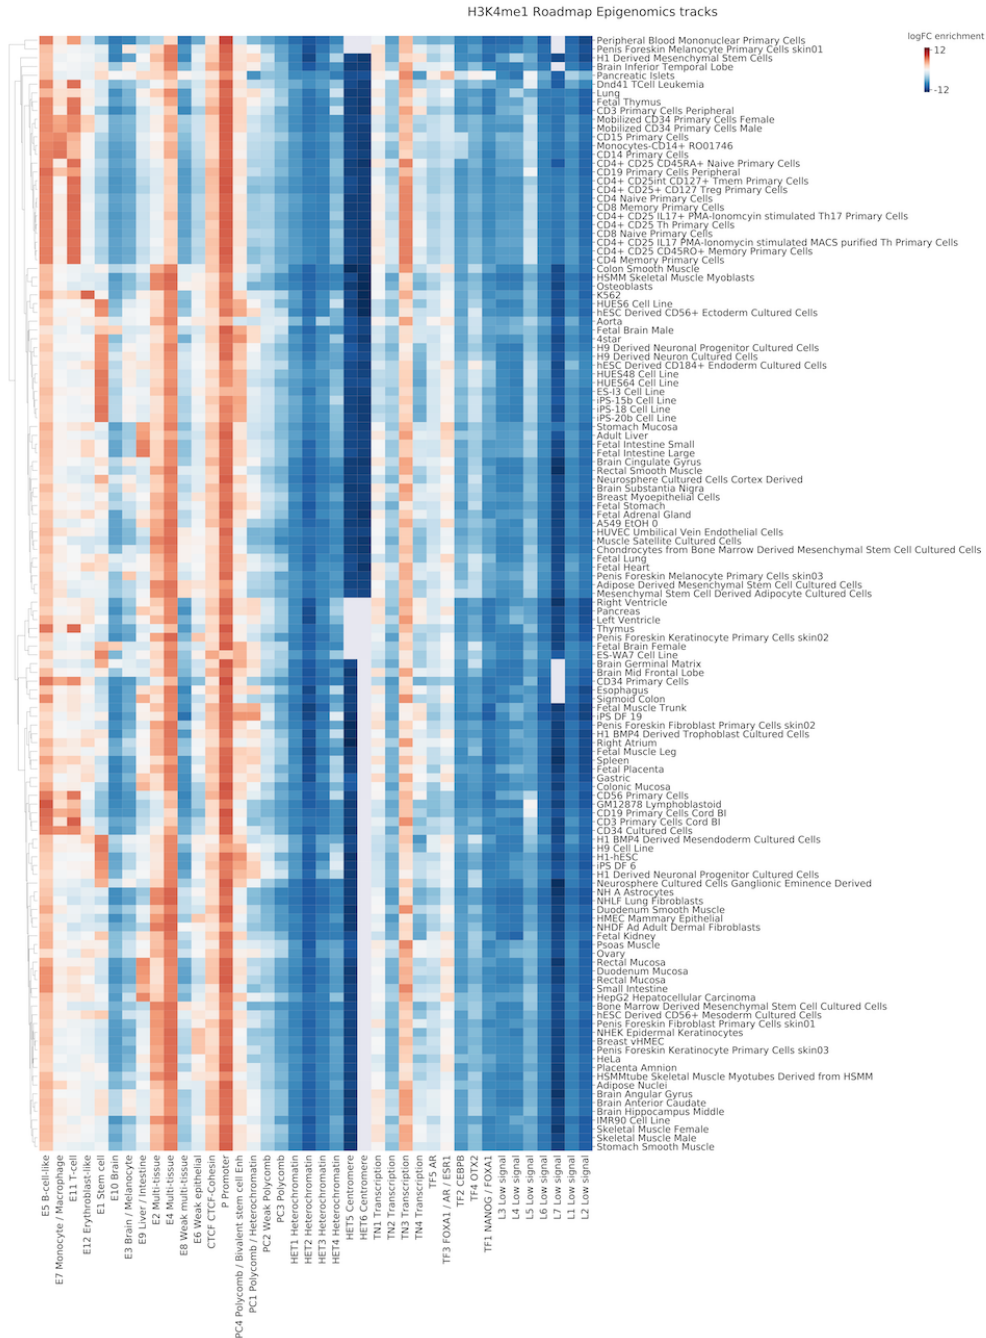

855  
856  
857  
858  
859  
860

**Supplementary Figure 8. Enrichment of tissue/cell type-specific H3K4me1 (enhancer mark) profiles in sequence classes.** Log fold change enrichment over genome-average background is shown in the heatmap. No overlap is indicated by the gray color in the heatmap.



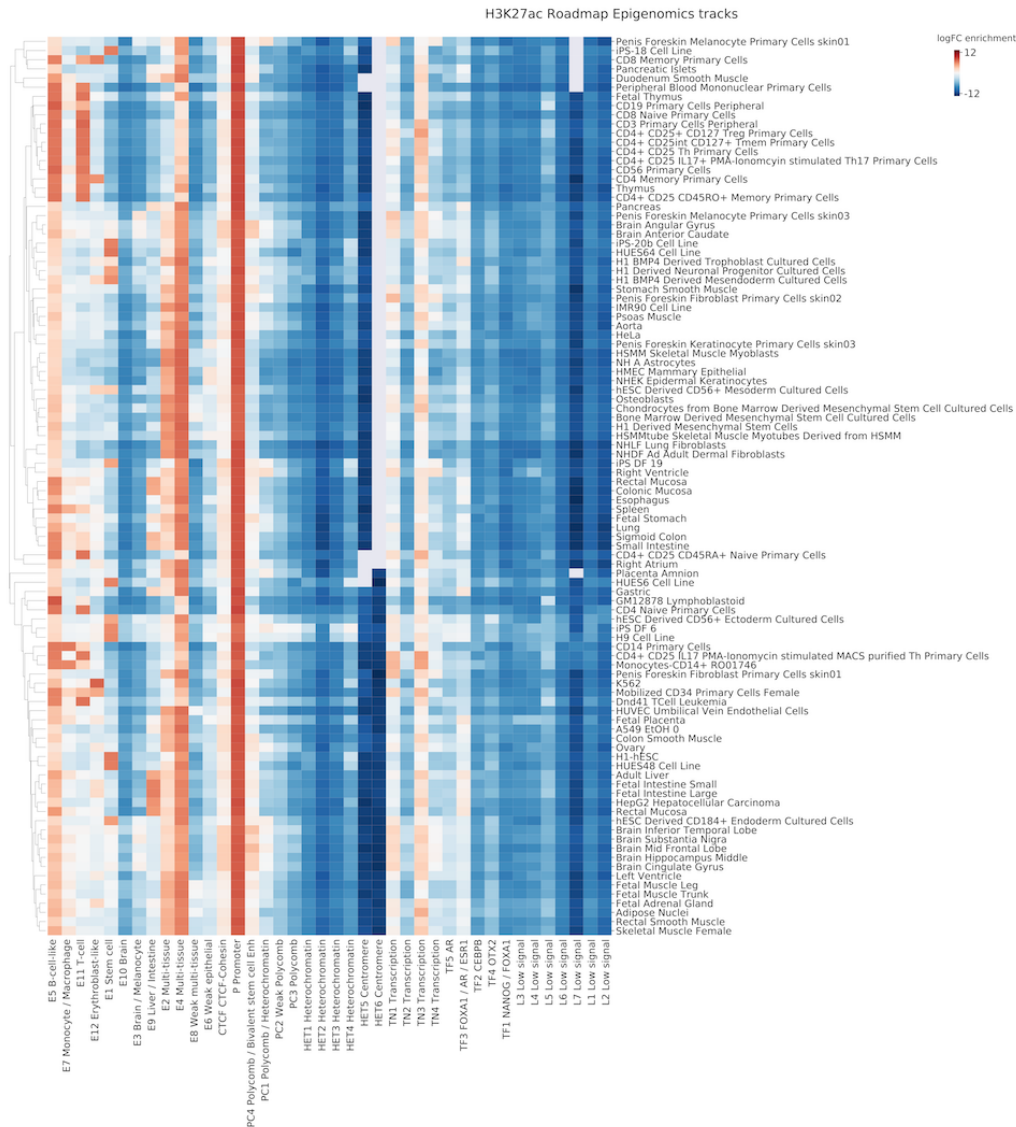

861  
 862 **Supplementary Figure 9. Enrichment of tissue/cell type-specific H3K27ac (enhancer mark) profiles**  
 863 **in sequence classes.** Log fold change enrichment over genome-average background is shown in the  
 864 heatmap. No overlap is indicated by the gray color in the heatmap.  
 865  
 866



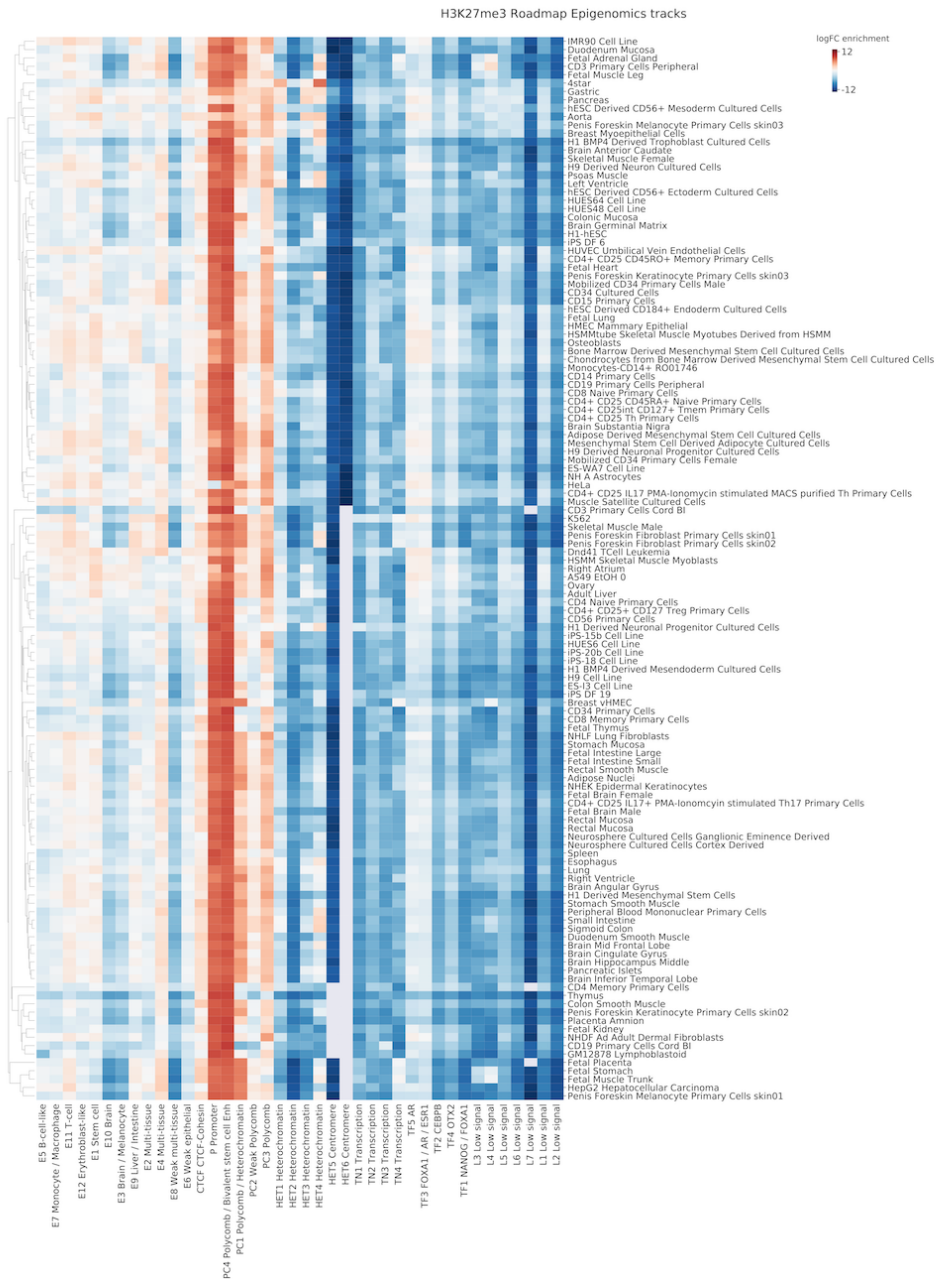

867  
 868 **Supplementary Figure 10. Enrichment of tissue/cell type-specific H3K27me3 (Polycomb mark)**  
 869 **profiles in sequence classes.** Log fold change enrichment over genome-average background is shown in  
 870 the heatmap. No overlap is indicated by the gray color in the heatmap.

871  
 872  
 873



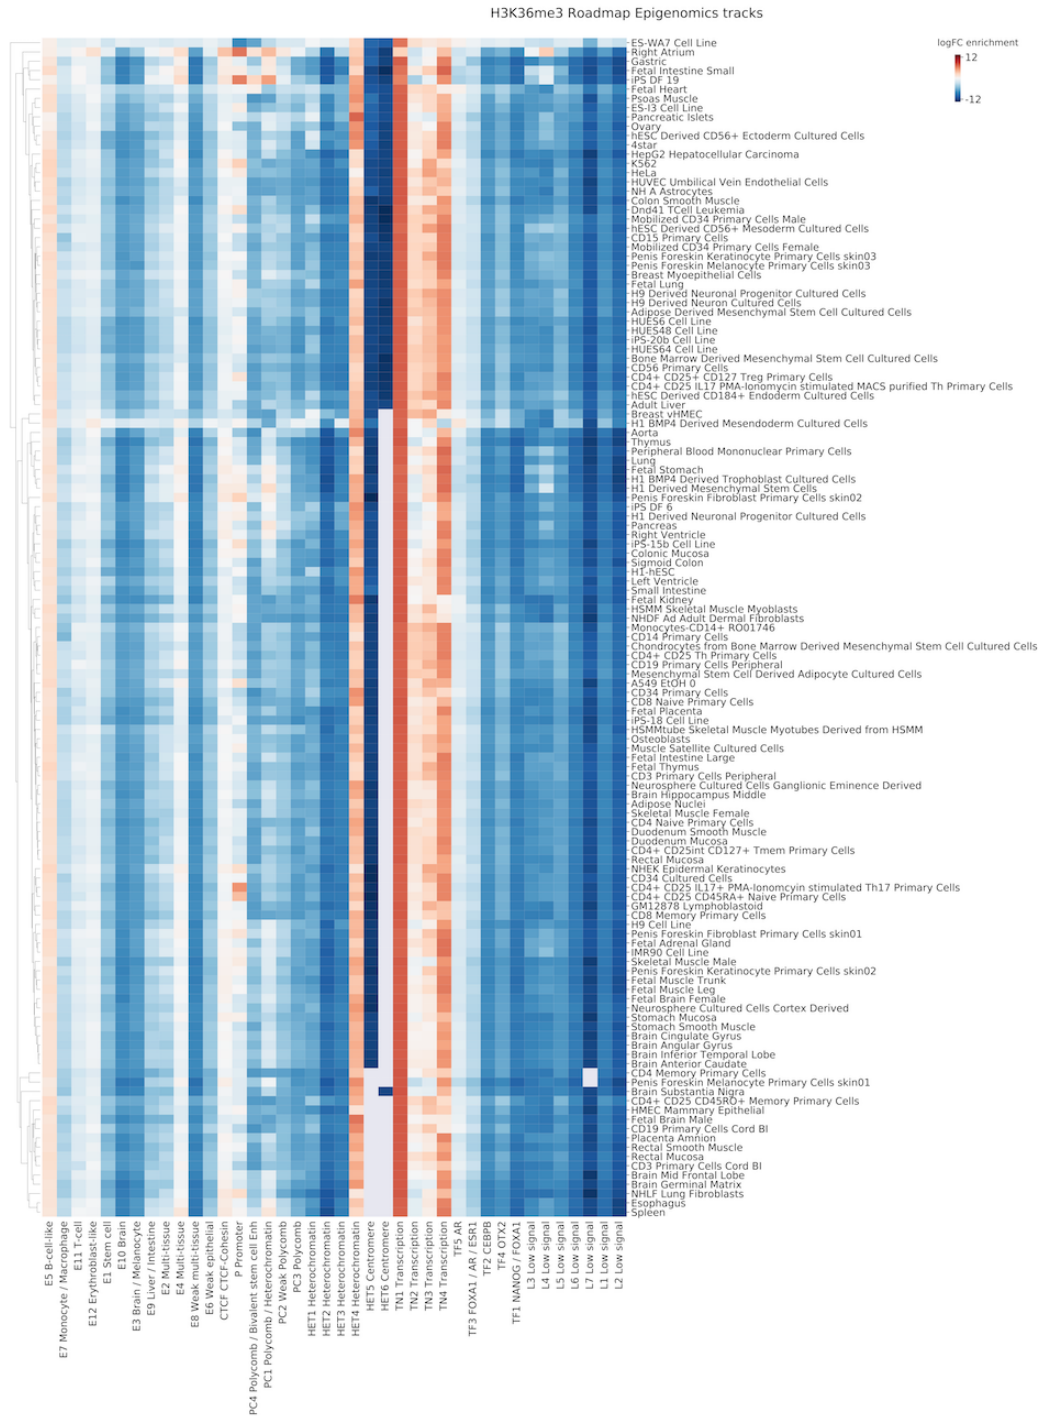

879  
880  
881  
882  
883  
884  
885  
886

**Supplementary Figure 12. Enrichment of tissue/cell type-specific H3K36me3 (transcription mark) profiles in sequence classes.** Log fold change enrichment over genome-average background is shown in the heatmap. No overlap is indicated by the gray color in the heatmap.

887

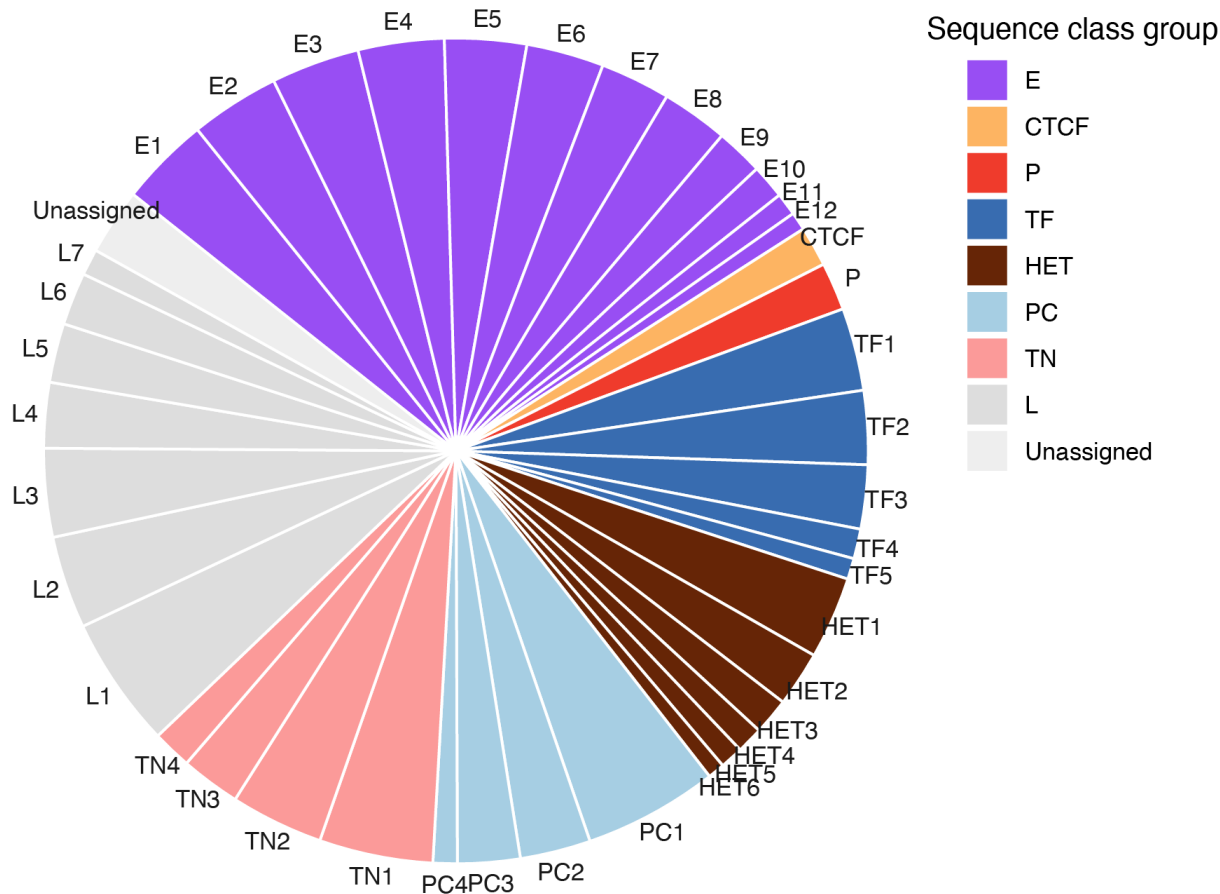

888

889 **Supplementary Figure 13. Genome sequence proportion covered by each sequence class.** The  
890 proportion of each sequence class is shown in the pie chart. Genome-wide sequence class assignments  
891 were based on Louvain clustering of Sei predictions of sequence tiling the genome with 100bp step size.  
892 The clusters unassigned to sequence classes due to the small size (below top 40 clusters) were categorized  
893 as “Unassigned”.

894

895

896

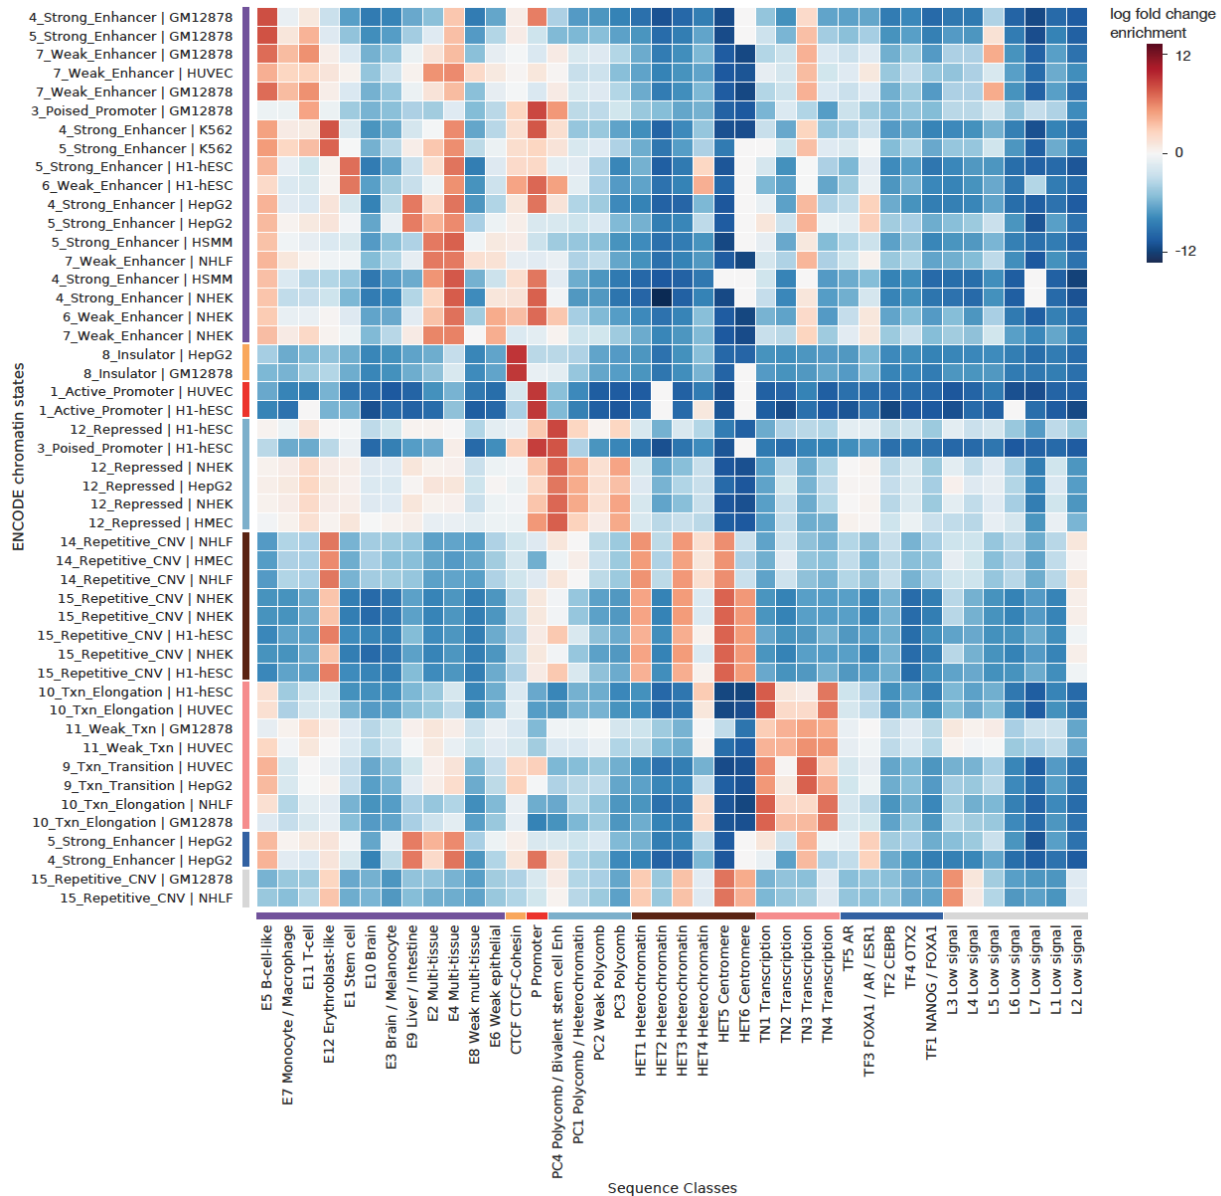

897

898 **Supplementary Figure 14. Sequence-class-specific enrichment of ENCODE chromatin states.** Log

899 fold change enrichment over genome-average background is shown in the heatmap. Top 2 chromatin

900 states enriched were selected for each sequence class.

901

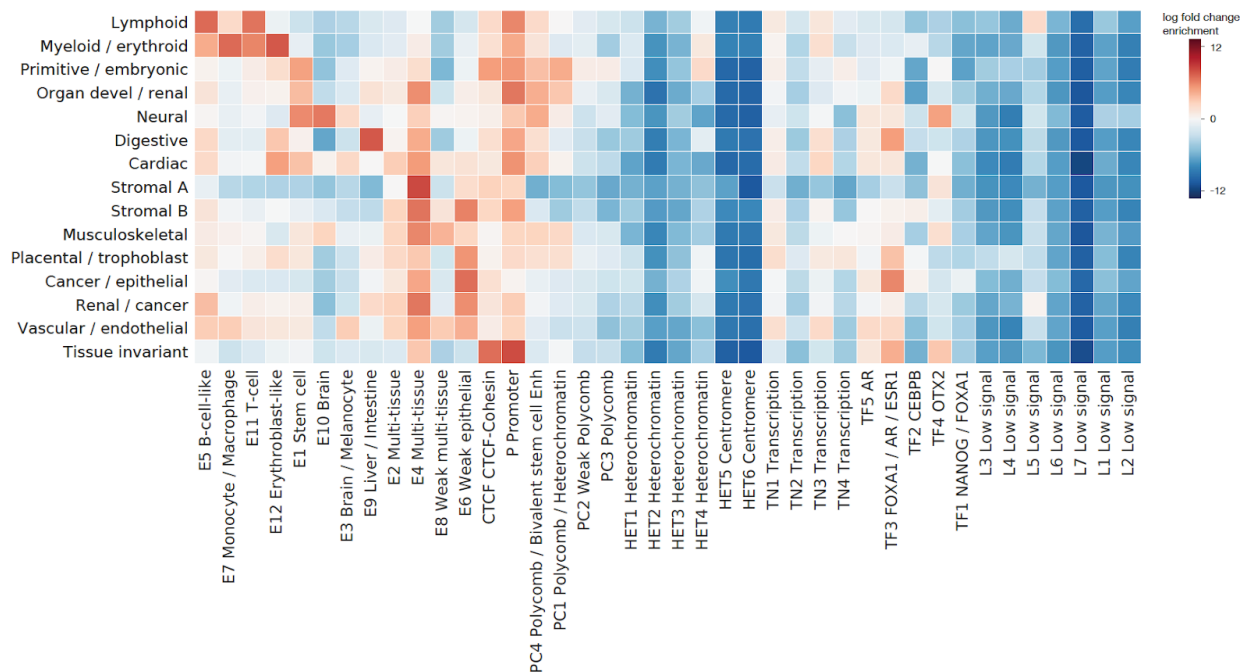

902  
 903 **Supplementary Figure 15. Sequence-class-specific enrichment of tissue-specific DHS vocabulary**<sup>25</sup>.  
 904 Log fold change enrichment over genome-average background is shown in the heatmap.

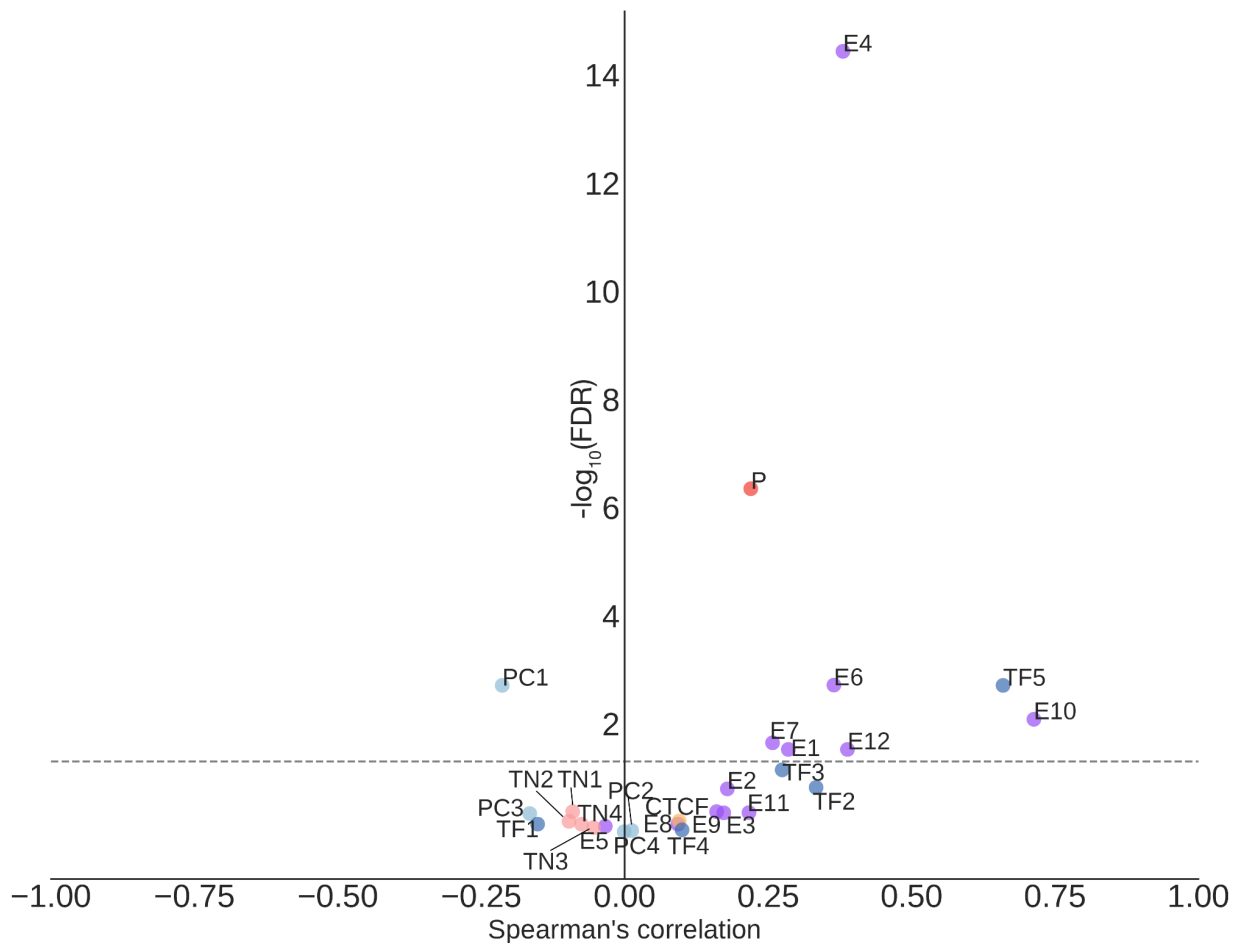



906 **Supplementary Figure 16. Regulatory sequence-class-level variant effects for SNPs with PIP > 0.95**  
 907 **are predictive of directional GTEx variant gene expression effects.** Variants assigned to sequence  
 908 classes based on the sequence class annotation for the reference genome. The x-axis shows Spearman  
 909 correlations between the predicted sequence-class-level variant effects and the signed GTEx variant effect  
 910 sizes (slopes) and the y-axis shows the corresponding log<sub>10</sub> p-values. The dotted gray line denotes the  
 911 Benjamini-Hochberg FDR < 0.05 threshold.

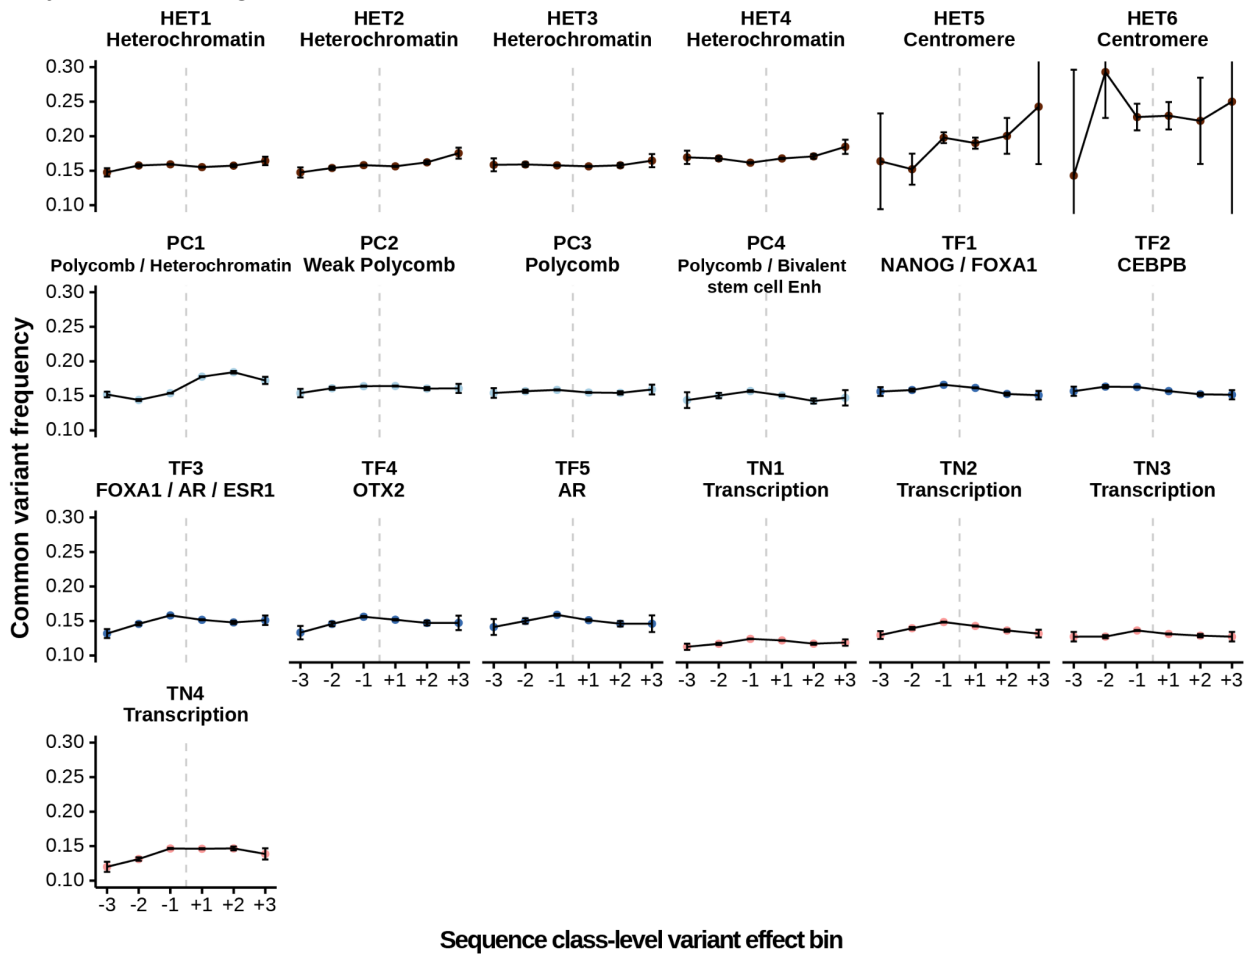

912 **Supplementary Figure 17. Population allele frequency profiles for variants in heterochromatin,**  
 913 **low signal, polycomb, and transcription sequence classes.** Comparison of common variant frequencies  
 914 of 1000 Genomes variants assigned to different sequence classes and variant effect bins. The common  
 915 variant threshold is >0.01 allele frequency across the 1000 Genomes population. Error bars show +/- 1  
 916 standard error(SE). The sequence-class-level variant effects are assigned to 6 bins (+3: top 1% positive,  
 917 +2: top 1%-10% positive, +1, top 10% -100% positive, -3: top 1% negative, -2: top 1%-10% negative, -1,  
 918 top 10% -100% negative).  
 919

920





947

948 **Supplementary File 5. Significant UKBB GWAS trait - sequence class associations identified with**  
949 **LDSR conditioned on the baseline annotations.**

950

951 **Supplementary File 6. Predicted sequence class-level variant effects for HGMD regulatory disease**  
952 **mutations.** HGMD regulatory disease mutations with sequence-class level variant effect score >1.1 are  
953 included.

954

955 **Supplementary File 7. Detailed Sei model architecture specification.**

956

## 957 **References**

958 1. Edwards, S. L., Beesley, J., French, J. D. & Dunning, M. Beyond GWASs: Illuminating the  
959 dark road from association to function. *American Journal of Human Genetics* vol. 93 779–  
960 797 (2013).

961 2. Wieczorek, D. *et al.* A specific mutation in the distant sonic hedgehog (SHH) cis-regulator  
962 (ZRS) causes Werner mesomelic syndrome (WMS) while complete ZRS duplications  
963 underlie Haas type polysyndactyly and preaxial polydactyly (PPD) with or without  
964 triphalangeal thumb. *Hum. Mutat.* **31**, 81–89 (2010).

965 3. Bernstein, B. E. *et al.* An integrated encyclopedia of DNA elements in the human genome.  
966 *Nature* **489**, 57–74 (2012).

967 4. Roadmap Epigenomics Consortium *et al.* Integrative analysis of 111 reference human  
968 epigenomes. *Nature* **518**, 317–330 (2015).

969 5. Zheng, R. *et al.* Cistrome Data Browser: expanded datasets and new tools for gene  
970 regulatory analysis. *Nucleic Acids Res.* **47**, D729–D735 (2019).

971 6. Fillion, G. J. *et al.* Systematic protein location mapping reveals five principal chromatin  
972 types in *Drosophila* cells. *Cell* **143**, 212–224 (2010).

973 7. Ernst, J. *et al.* Mapping and analysis of chromatin state dynamics in nine human cell types.  
974 *Nature* **473**, 43–49 (2011).

- 975 8. Hoffman, M. M. *et al.* Unsupervised pattern discovery in human chromatin structure  
976 through genomic segmentation. *Nat. Methods* **9**, 473–476 (2012).
- 977 9. Zhou, J. & Troyanskaya, O. G. Probabilistic modelling of chromatin code landscape reveals  
978 functional diversity of enhancer-like chromatin states. *Nat. Commun.* (2016)  
979 doi:10.1038/ncomms10528.
- 980 10. Boix, C. A., James, B. T., Park, Y. P., Meuleman, W. & Kellis, M. Regulatory genomic  
981 circuitry of human disease loci by integrative epigenomics. *Nature* **590**, 300–307 (2021).
- 982 11. Alipanahi, B., DeLong, A., Weirauch, M. T. & Frey, B. J. Predicting the sequence  
983 specificities of DNA- and RNA-binding proteins by deep learning. *Nat. Biotechnol.* **33**,  
984 831–838 (2015).
- 985 12. Zhou, J. & Troyanskaya, O. G. Predicting effects of noncoding variants with deep learning-  
986 based sequence model. *Nat. Methods* **12**, 931–934 (2015).
- 987 13. Zhou, J. *et al.* Deep learning sequence-based ab initio prediction of variant effects on  
988 expression and disease risk. *Nat. Genet.* (2018) doi:10.1038/s41588-018-0160-6.
- 989 14. Kelley, D. R. *et al.* Sequential regulatory activity prediction across chromosomes with  
990 convolutional neural networks. *Genome Res.* (2018) doi:10.1101/gr.227819.117.
- 991 15. Kelley, D. R. Cross-species regulatory sequence activity prediction. *PLoS Comput. Biol.* **16**,  
992 e1008050 (2020).
- 993 16. Avsec, Ž. *et al.* Deep learning at base-resolution reveals motif syntax of the cis-regulatory  
994 code. *bioRxiv* 737981 (2019) doi:10.1101/737981.
- 995 17. Cofer, E. M. *et al.* Modeling transcriptional regulation of model species with deep learning.  
996 *Genome Res.* **31**, 1097–1105 (2021).
- 997 18. Loh, P.-R., Kichaev, G., Gazal, S., Schoech, A. P. & Price, A. L. Mixed-model association

- 998 for biobank-scale datasets. *Nat. Genet.* **50**, 906–908 (2018).
- 999 19. McInnes, L., Healy, J., Saul, N. & Großberger, L. UMAP: Uniform Manifold  
1000 Approximation and Projection. *Journal of Open Source Software* (2018)  
1001 doi:10.21105/joss.00861.
- 1002 20. Poličar, P. G., Stražar, M. & Zupan, B. openTSNE: a modular Python library for t-SNE  
1003 dimensionality reduction and embedding. *BioRxiv* (2019).
- 1004 21. Blondel, V. D., Guillaume, J.-L., Lambiotte, R. & Lefebvre, E. Fast unfolding of  
1005 communities in large networks. *J. Stat. Mech.* **2008**, P10008 (2008).
- 1006 22. Hawkins, R. D. *et al.* Distinct epigenomic landscapes of pluripotent and lineage-committed  
1007 human cells. *Cell Stem Cell* **6**, 479–491 (2010).
- 1008 23. Boros, J., Arnoult, N., Stroobant, V., Collet, J.-F. & Decottignies, A. Polycomb repressive  
1009 complex 2 and H3K27me3 cooperate with H3K9 methylation to maintain heterochromatin  
1010 protein 1 $\alpha$  at chromatin. *Mol. Cell. Biol.* **34**, 3662–3674 (2014).
- 1011 24. Schwämmle, V. *et al.* Systems Level Analysis of Histone H3 Post-translational  
1012 Modifications (PTMs) Reveals Features of PTM Crosstalk in Chromatin Regulation. *Mol.*  
1013 *Cell. Proteomics* **15**, 2715–2729 (2016).
- 1014 25. Meuleman, W. *et al.* Index and biological spectrum of human DNase I hypersensitive sites.  
1015 *Nature* **584**, 244–251 (2020).
- 1016 26. The GTEx Consortium. The GTEx Consortium atlas of genetic regulatory effects across  
1017 human tissues. *Science* **369**, 1318–1330 (2020).
- 1018 27. Kerimov, N. *et al.* A compendium of uniformly processed human gene expression and  
1019 splicing quantitative trait loci. *Nat. Genet.* **53**, 1290–1299 (2021).
- 1020 28. 1000 Genomes Project Consortium, T. 1000 G. P. *et al.* An integrated map of genetic



- 1021 variation from 1,092 human genomes. *Nature* (2012) doi:10.1038/nature11632.
- 1022 29. Finucane, H. K. *et al.* Partitioning heritability by functional annotation using genome-wide  
1023 association summary statistics. *Nat. Genet.* **47**, 1228–1235 (2015).
- 1024 30. Finucane, H. K. *et al.* Heritability enrichment of specifically expressed genes identifies  
1025 disease-relevant tissues and cell types. *Nat. Genet.* **50**, 621–629 (2018).
- 1026 31. Reshef, Y. A. *et al.* Detecting genome-wide directional effects of transcription factor  
1027 binding on polygenic disease risk. doi:10.1101/204685.
- 1028 32. Sudlow, C. *et al.* UK biobank: an open access resource for identifying the causes of a wide  
1029 range of complex diseases of middle and old age. *PLoS Med.* **12**, e1001779 (2015).
- 1030 33. Paththinige, C. S., Sirisena, N. D. & Dissanayake, V. H. W. Genetic determinants of  
1031 inherited susceptibility to hypercholesterolemia – a comprehensive literature review. *Lipids*  
1032 *Health Dis.* **16**, 103 (2017).
- 1033 34. Stenson, P. D. *et al.* The Human Gene Mutation Database: 2008 update. *Genome Med.* **1**, 13  
1034 (2009).
- 1035 35. Al-Qattan, M. M., Al Abdulkareem, I., Al Haidan, Y. & Al Balwi, M. A novel mutation in  
1036 the SHH long-range regulator (ZRS) is associated with preaxial polydactyly, triphalangeal  
1037 thumb, and severe radial ray deficiency. *Am. J. Med. Genet. A* **158A**, 2610–2615 (2012).
- 1038 36. Gurnett, C. A. *et al.* Two novel point mutations in the long-range SHH enhancer in three  
1039 families with triphalangeal thumb and preaxial polydactyly. *Am. J. Med. Genet. A* **143A**,  
1040 27–32 (2007).
- 1041 37. De Castro-Orós, I. *et al.* Functional analysis of LDLR promoter and 5' UTR mutations in  
1042 subjects with clinical diagnosis of familial hypercholesterolemia. *Hum. Mutat.* **32**, 868–872  
1043 (2011).

- 1044 38. Ilkovski, B. *et al.* Mutations in PIGY: expanding the phenotype of inherited  
1045 glycosylphosphatidylinositol deficiencies. *Hum. Mol. Genet.* **24**, 6146–6159 (2015).
- 1046 39. Sakai, T., Ohtani, N., McGee, T. L., Robbins, P. D. & Dryja, T. P. Oncogenic germ-line  
1047 mutations in Sp1 and ATF sites in the human retinoblastoma gene. *Nature* **353**, 83–86  
1048 (1991).
- 1049 40. Plenge, R. M. *et al.* A promoter mutation in the XIST gene in two unrelated families with  
1050 skewed X-chromosome inactivation. *Nat. Genet.* **17**, 353–356 (1997).
- 1051 41. Pugacheva, E. M. *et al.* Familial cases of point mutations in the XIST promoter reveal a  
1052 correlation between CTCF binding and pre-emptive choices of X chromosome inactivation.  
1053 *Hum. Mol. Genet.* **14**, 953–965 (2005).
- 1054 42. De Gobbi, M. *et al.* A regulatory SNP causes a human genetic disease by creating a new  
1055 transcriptional promoter. *Science* (2006) doi:10.1126/science.1126431.
- 1056 43. Horn, S. *et al.* TERT promoter mutations in familial and sporadic melanoma. *Science* **339**,  
1057 959–961 (2013).
- 1058 44. Surrey, S., Delgrosso, K., Malladi, P. & Schwartz, E. A single-base change at position -175  
1059 in the 5'-flanking region of the G gamma-globin gene from a black with G gamma-beta+  
1060 HPFH. *Blood* **71**, 807–810 (1988).
- 1061 45. Amemiya, H. M., Kundaje, A. & Boyle, A. P. The ENCODE Blacklist: Identification of  
1062 Problematic Regions of the Genome. *Sci. Rep.* **9**, 9354 (2019).
- 1063 46. Chen, K. M., Cofer, E. M., Zhou, J. & Troyanskaya, O. G. Selene: a PyTorch-based deep  
1064 learning library for sequence data. *Nat. Methods* (2019) doi:10.1038/s41592-019-0360-8.
- 1065
