# Supplementary material for: A sequence-based global map of regulatory activity for deciphering human genetics
Source: bioRxiv or medRxiv preprint supplement (doi:10.1101/2021.07.29.454384), 2022-02-15

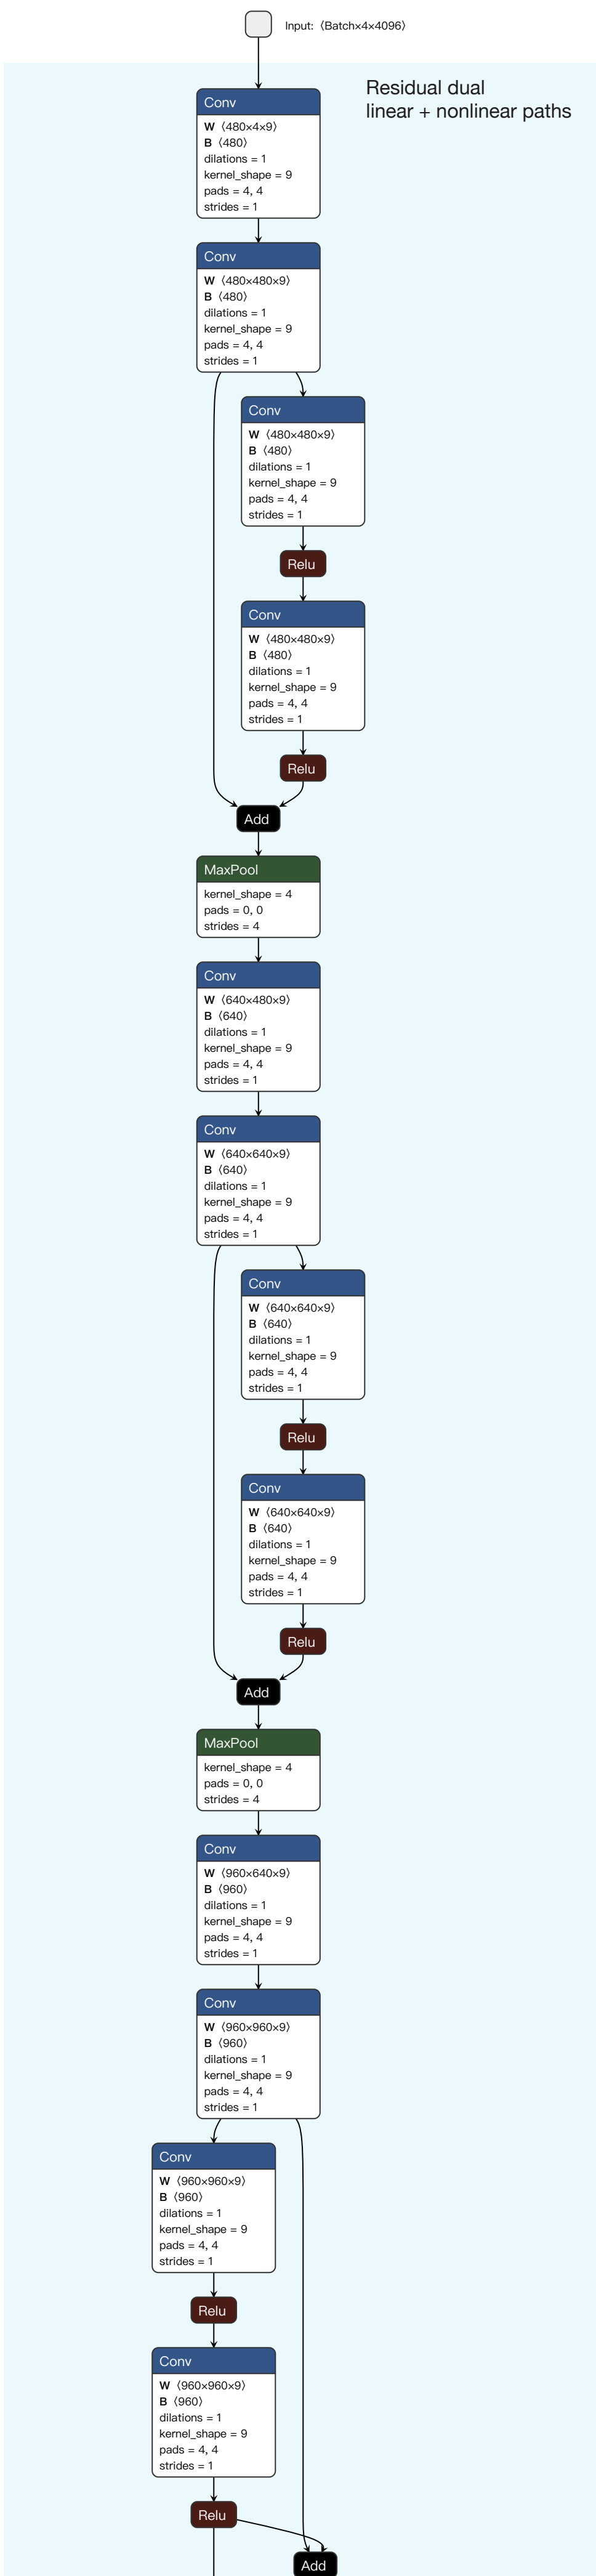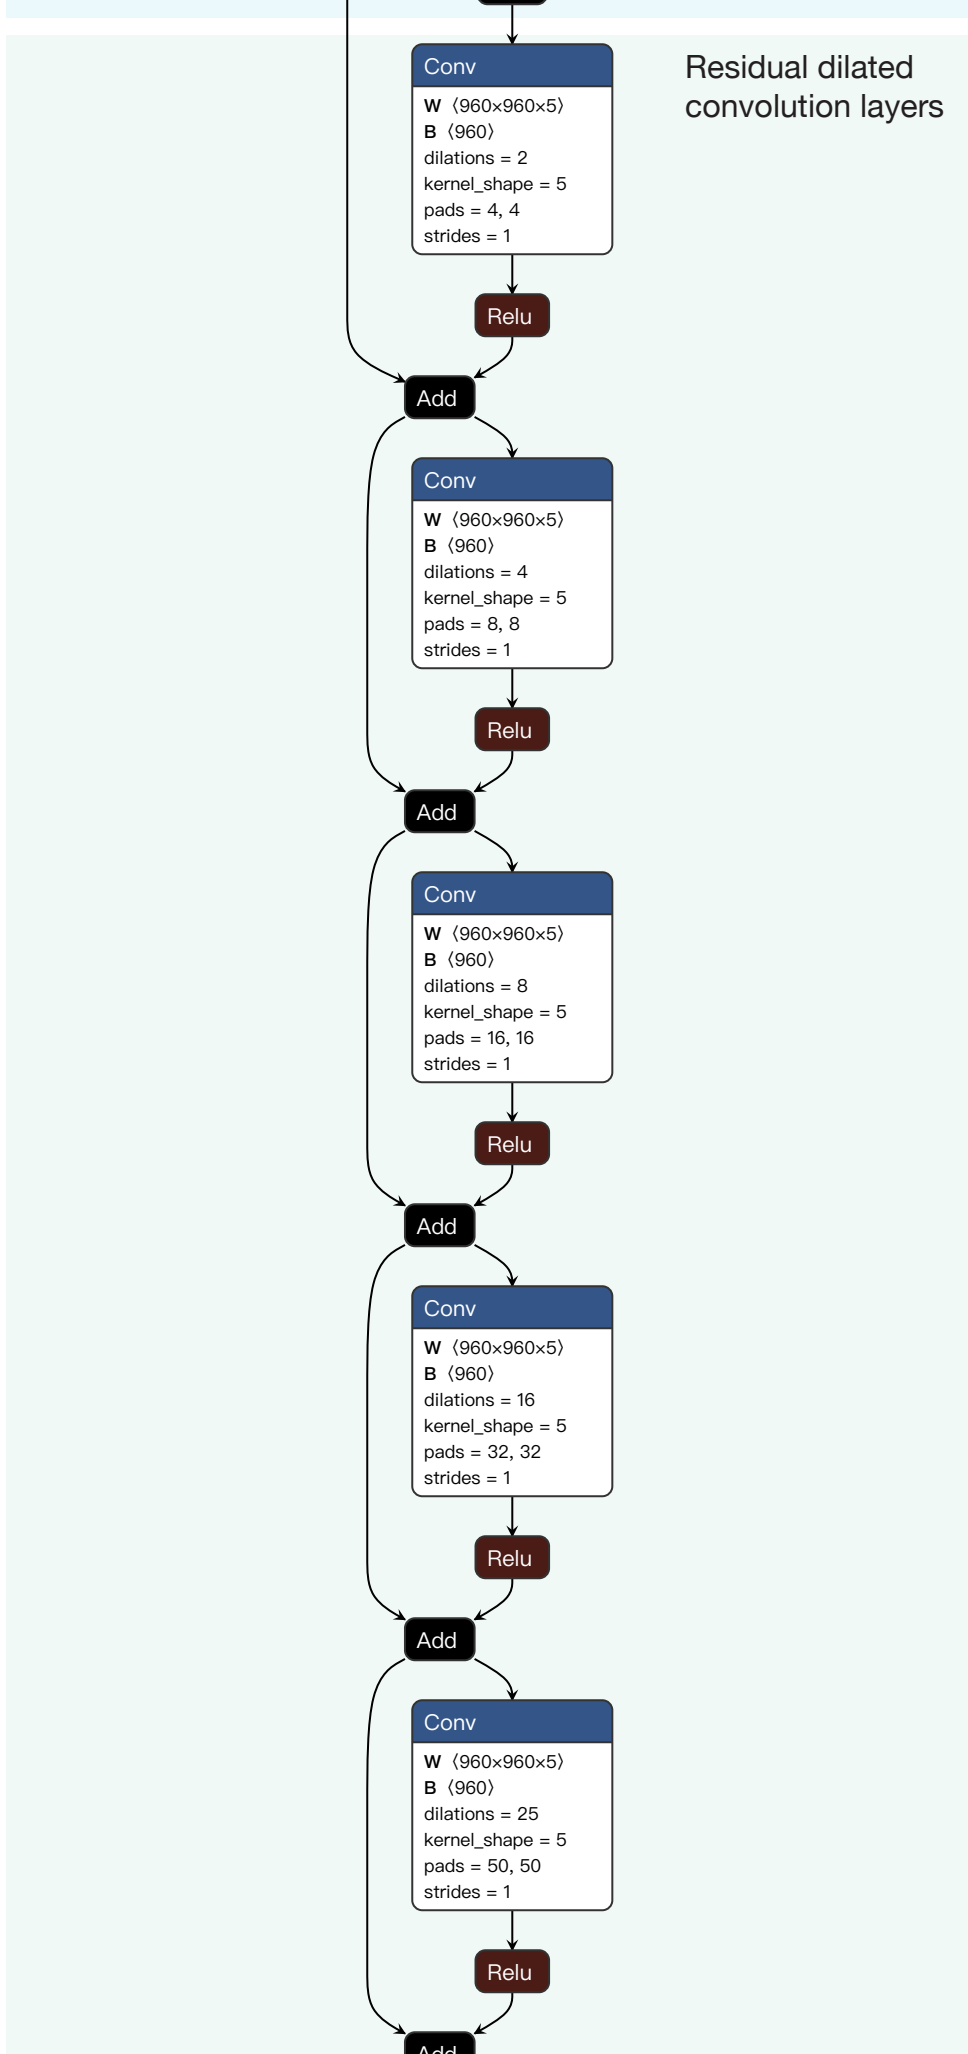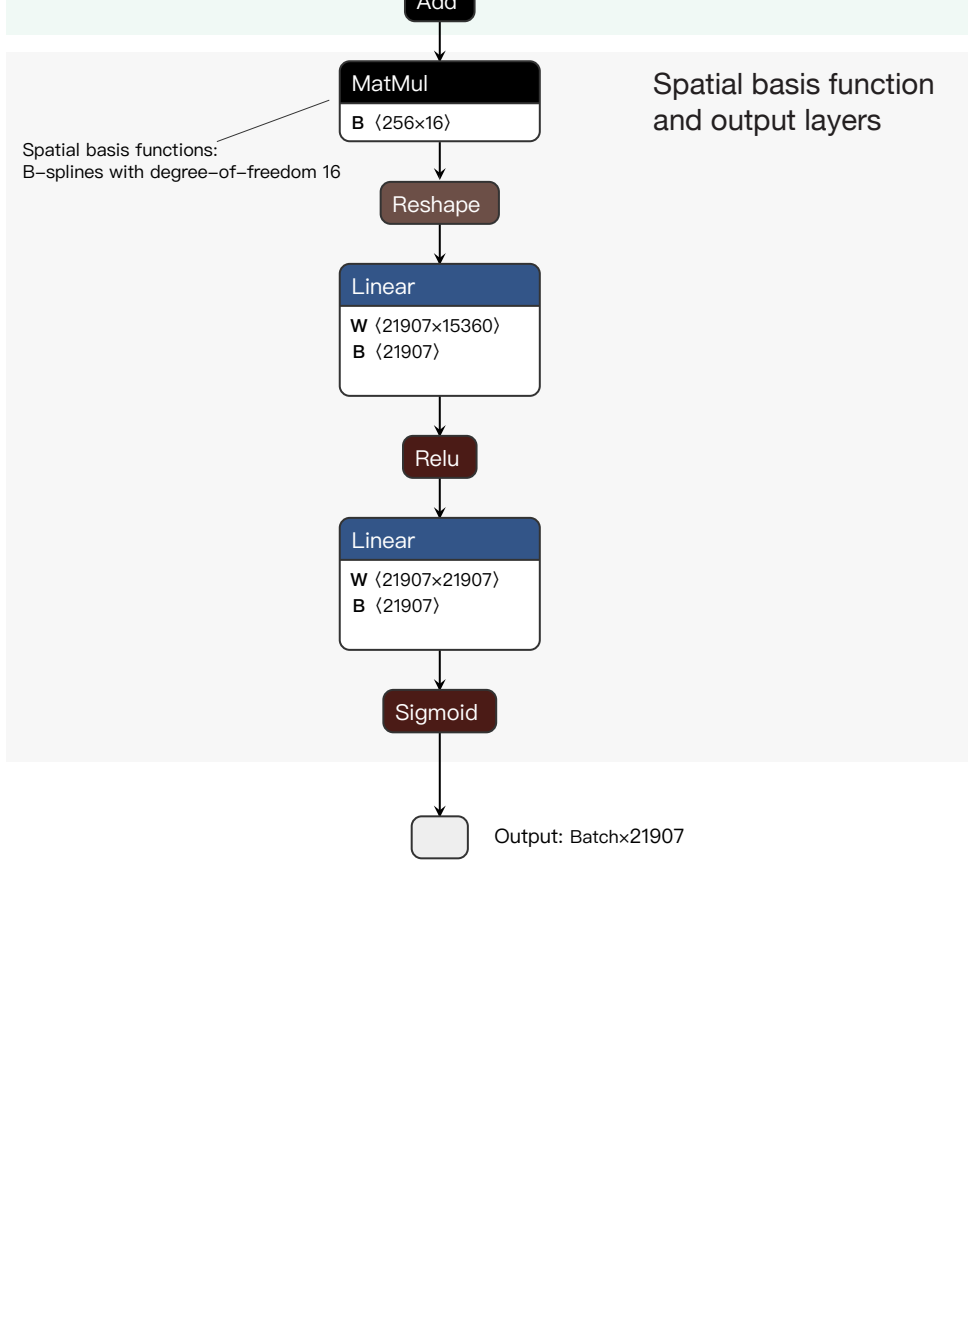

Supplement: Supplementary file [file media-7.pdf]
